# Supplementary material for: Gap junction-mediated glycinergic inhibition ensures precise temporal patterning in vocal behavior
Source: eLife. 2021 Mar 15;10:e59390. doi: 10.7554/eLife.59390 (PMC7963477; doi:10.7554/eLife.59390)
Supplement: Figure 2—source data 1. [file elife-59390-fig2-data1.xlsx]

## Sheet: Figure 2C
	This data is used to generate the box plots in Figure 2C
		Vocal				antidromic
	in mV	difference to RMP in mV			in mV	difference to RMP in mV
OB-10-02-c007-VMN	RMP	AHP_amp	AP_amp		RMP	AHP_amp	AP_amp
	-59.204	-13.458	33.752		-73.894	-1.0573	42.491
	-59.419	-13.182	33.723		-73.842	-0.68143	42.745
	-59.545	-12.751	33.971		-71.774	-0.49171	41.836
	-56.698	-15.506	31.796		-71.449	-0.11514	41.511
	-56.344	-15.464	31.655		-72.536	-0.37009	41.775
	-56.682	-15.065	32.329		-72.076	-0.73912	41.07
	-56.31	-15.253	31.774		-72.111	-0.39833	41.106
	-58.634	-14.15	34.739		-72.988	-0.55913	41.921
	-58.343	-13.679	34.417		-72.001	-0.84452	41.758
	-59.22	-13.747	35.508		-71.954	-0.55563	41.894
OB-11-01-c001-VMN	-58.979	-10.784	26.448		-48.158	-0.21263	38.728
	-60.378	-10.637	27.236		-48.176	0.38569	39.021
	-62.49	-9.5925	27.273		-48.87	0.286	38.555
	-63.511	-9.426	26.035		-49.675	0.023212	39.513
	-63.404	-9.0443	27.516		-49.624	-0.15	39.37
	-63.115	-9.0589	25.823		-50.99	-0.15753	39.759
	-63.428	-9.8142	23.328
	-62.882	-8.4985	26.902
	-62.475	-9.1193	26.098
	-61.596	-9.0522	27.111
	-61.067	-10.191	22.432
OB-11-01-c002-VMN	-57.613	-11.051	24.685		-67.636	-1.9136	17.129
	-58.567	-11.471	24.631		-67.252	-2.3589	17.416
	-58.801	-10.993	26.818		-67.023	-2.9843	17.707
	-59.577	-10.644	25.946		-72.809	3.1682	23.432
	-60.102	-10.271	26.411		-71.035	2.4007	21.688
	-61.761	-10.261	26.513
	-62.422	-10.454	25.862
	-62.684	-10.314	25.148
	-63.298	-9.792	26.188
	-62.35	-10.19	26.523
	-62.287	-10.314	25.727
	-62.148	-10.362	25.588
OB-11-01-c003-VMN:	-59.586	-6.3624	38.773		-76.797	-4.8982	33.92
	-61.798	-6.5312	38.055		-77.17	-4.281	33.958
	-63.741	-6.1746	38.229		-77.621	-4.96	34.56
	-64.283	-6.2128	39.258		-77.991	-4.9252	34.351
	-64.941	-6.1348	38.39		-77.856	-4.9685	34.002
	-65.329	-5.9599	40.763		-69.004	-2.987	28.324
	-65.096	-5.9184	40.438		-68.589	-3.2491	28.459
	-65.062	-5.9828	40.099		-68.613	-3.4085	28.604
OB-11-02-c002-VMN	-78.154	0.54795	43.913		-73.715	-1.5105	26.322
	-77.583	0.25143	43.892		-74.261	-2.0022	26.349
	-77.215	-2.2226	42.73		-74.409	-1.5495	26.801
	-76.339	-0.10734	41.671		-73.927	-1.848	29.677
	-75.619	-0.24733	42.752		-73.885	-1.6156	29.177
	-75.027	-0.59517	42.77		-74.329	-2.6054	29.377
	-74.892	-0.97444	41.353		-74.162	-1.766	29.667
	-75.032	-0.22395	41.738		-74.183	-2.2942	29.017
	-75.106	-0.57725	41.079		-74.318	-2.1586	29.641
	-75.892	-0.18857	42.689		-74.957	-2.2828	29.913
	-75.408	-0.88577	42.236		-74.927	-2.0075	30.494
					-72.989	-2.6944	28.861
OB-11-02-c004-VMN	-69.648	-10.064	25.794		-71.026	-3.6199	15.057
	-70.503	-9.2702	30.525		-72.374	-4.2247	15.032
	-70.552	-8.6715	26.18		-73.225	-4.5947	15.181
	-70.974	-8.6154	30.417		-65.993	-5.0517	15.12
	-71.966	-7.6853	28.509		-71.007	-4.3101	15.74
	-71.903	-7.4735	27.408		-72.939	-4.4235	16.115
	-71.838	-7.1416	27.526		-73.46	-4.5123	15.751
	-71.541	-7.0414	26.711		-73.447	-3.9758	15.555
	-71.587	-6.721	28.496		-73.11	-4.7103	14.668
	-71.651	-6.3217	30.391		-73.561	-4.3199	15.12
	-71.523	-7.1823	31.178		-73.275	-4.5446	14.651
	-70.889	-7.2664	30.209
OB-11-03-c001-VMN	-62.436	-14.102	30.27		-62.461	-0.16073	19.126
	-62.195	-13.794	32.837		-61.576	-0.099696	18.089
	-62.24	-13.505	31.356		-61.701	-0.067047	18.335
	-62.407	-13.185	32.561		-61.589	-1.7354	18.284
	-62.636	-12.621	33.583		-61.951	-2.0134	18.403
	-62.562	-12.48	32.228		-61.862	-2.5606	18.222
	-62.319	-12.296	33.694		-61.445	-2.428	17.866
	-62.191	-12.149	33.169		-61.372	-2.2567	17.152
	-62.228	-11.777	33.145		-61.062	-2.2623	17.177
	-62.108	-11.745	32.78		-61.095	-2.0457	17.241
	-61.655	-11.862	32.602		-61.635	-1.8411	18.026
OB-11-03-c004-VMN
	-63.525	-15.668	30.902		-63.797	-2.1511	20.127
	-61.053	-16.34	29.131		-64.096	-2.3099	20.792
	-60.059	-16.906	27.07		-64.631	-2.05	21.784
	-56.642	-17.576	25.423		-65.226	-2.0656	23.447
	-57.694	-17.104	25.895		-65.763	-1.8335	24.717
	-59.073	-16	26.724		-65.831	-1.9789	25.304
	-58.721	-16.078	26.922		-66.311	-1.6514	27.279
	-59.438	-15.452	26.906		-66.45	-1.9704	28.089
	-59.838	-14.777	27.459		-67.113	-2.0093	29.729
	-59.925	-14.843	27.607		-67.519	-1.6338	30.562
	-60.278	-14.246	28.174
OB-11-03-c002-VMN	-48.103	-16.777	15.694		-48.316	-5.4555	4.5542
	-47.767	-16.076	14.747		-48.071	-5.1214	4.1865
	-47.366	-15.287	14.926		-47.877	-5.1015	4.2064
	-47.034	-15.069	13.953		-47.111	-4.22	4.1113
	-46.275	-14.608	13.133		-46.399	-4.9011	3.8269
	-45.663	-14.182	13.558		-46.198	-4.1863	4.1145
	-45.414	-13.516	13.828		-45.651	-3.3301	3.5668
	-45.213	-13.228	12.56		-45.686	-4.0882	3.6022
OB-11-09-c001-VMN	-37.394	-15.31	21.83		-37.612	-5.5098	10.237
	-36.74	-15.017	19.62		-36.875	-5.3611	9.562
	-36.504	-14.308	19.872		-36.74	-6.1068	9.213
	-35.542	-14.049	16.896		-36.141	-5.0881	8.6448
	-35.755	-13.012	17.414		-35.451	-6.0529	8.4124
	-34.735	-12.536	17.493		-35.21	-5.1039	7.9576
	-35.123	-1.8642	0.058372		-35.221	-5.2457	8.2126
	-34.86	-11.557	16.275		-35.16	-5.1537	8.0909
	-34.733	-10.952	16.667		-34.637	-5.7072	7.6289
	-34.494	-10.825	16.092		-34.465	-5.0554	7.5178
	-34.914	-9.7939	15.993		-34.531	-4.2875	7.3397
	-34.045	-10.206	15.582		-34.14	-4.5871	7.1927
OB-11-09-c002-VMN	-51.537	-15.632	26.39		-51.766	-6.7057	18.502
	-51.306	-15.467	25.396		-51.918	-7.1945	18.044
	-51.033	-14.793	25.062		-51.253	-6.9744	17.104
	-50.795	-14.665	24.031		-52.071	-5.7596	18.197
	-50.441	-14.256	23.067		-50.837	-7.0551	17.084
	-50.839	-13.706	23.526		-50.682	-6.2947	16.319
	-50.275	-13.476	20.307		-50.336	-6.6096	18.842
	-50.631	-12.571	22.097		-50.005	-6.3608	18.633
	-49.615	-13.16	21.233		-49.836	-6.9263	15.168
	-48.876	-12.922	20.556		-49.199	-9.1506	17.766
	-48.522	-12.452	20.293		-49.104	-9.0018	17.854
	-47.978	-12.172	20.878		-48.632	-8.4668	17.351
OB-11-09-c007-VMN	-57.4	-14.744	33.596		-56.819	-1.4387	15.834
	-56.961	-15.183	33.096		-57.424	-3.0005	17.935
	-56.94	-14.471	32.74		-57.36	-2.9729	17.749
	-57.006	-13.977	32.806		-56.79	-3.3904	16.995
	-56.727	-13.586	31.672		-56.369	-2.7132	16.238
	-55.481	-14.13	30.792		-56.178	-2.4769	16.078
	-55.546	-13.516	30.643		-55.91	-3.3244	15.688
	-56.078	-13.136	31.268		-56.28	-2.8939	15.813
	-56.297	-12.733	31.334		-56.286	-2.3381	15.85
	-56.697	-12.791	32.07		-56.517	-3.2362	16.356
	-56.829	-12.263	33.544		-56.993	-1.8757	15.855
