# Supplementary material for: Gap junction-mediated glycinergic inhibition ensures precise temporal patterning in vocal behavior
Source: eLife. 2021 Mar 15;10:e59390. doi: 10.7554/eLife.59390 (PMC7963477; doi:10.7554/eLife.59390)
Supplement: Figure 3—figure supplement 2—source data 1. [file elife-59390-fig3-figsupp2-data1.xlsx]

## Sheet: Figure 3 -Supplemental 2
	This sheet summarized the results for the dorsal root cutting experiments
		Control									dorsal roots cut
	Vocal				antidromic					Vocal				antidromic
	in mV	difference to RMP in mV			in mV	difference to RMP in mV				in mV	difference to RMP in mV			in mV	difference to RMP in mV
OB-15-18-c001	HYP	AP	RMP		HYP	AP	RMP			HYP	AP	RMP		HYP	AP	RMP
	-13.677	45.619	-76.381		-9.1436	49.176	-76.824		OB-15-18-c006-dorsal roots cut	-8.9697	27.346	-51.547		-5.6177	38.419	-56.882
	-13.66	46.918	-76.611		-8.5384	49.079	-77.094			-8.3869	30.859	-52.374		-6.3754	38.424	-56.186
	-13.065	47.116	-76.84		-8.8508	48.797	-76.934							-5.4274	40.135	-57.347
	-13.047	49.178	-79.451		-8.7052	49.187	-77.019			-7.0604	32.033	-52.388		-5.198	39.785	-57.76
	-12.981	49.122	-79.793		-8.5977	48.745	-76.913			-6.8748	31.516	-51.536		-4.2625	38.554	-58.207
	-12.957	46.155	-75.544		-8.5547	49.185	-76.986			-6.2985	31.452	-52.6		-5.1436	35.597	-57.082
	-12.928	49.084	-79.601		-9.0945	49.011	-76.935			-6.1544	32.023	-52.195		-6.8553	32.757	-56.408
	-12.915	48.944	-79.736		-8.227	48.902	-77.07			-5.7956	30.825	-52.493		-5.6811	33.168	-56.697
	-12.883	45.711	-77.114		-8.7172	49.053	-76.946			-5.7902	32.876	-52.224		-5.4537	29.611	-57.382
	-12.878	48.493	-79.285		-8.2	49.967	-77.982			-5.5459	40.902	-58.297		-6.6819	28.108	-56.856
	-12.815	48.403	-78.646		-8.53	48.66	-76.858			-5.3487	31.486	-52.543		-5.2747	29.393	-57.469
	-12.725	47.639	-77.058		-8.6255	50.182	-77.709			-5.2884	33.835	-52.817		-5.7394	30.912	-57.737
	-12.723	48.77	-78.982		-9.2831	48.517	-76.441			-5.0399	34.114	-53.035		-6.9617	26.699	-57.339
	-12.659	47.644	-77.154							-4.2536	34.199	-53.516		-5.5313	30.479	-58.342
	-12.646	47.687	-77.076							-4.2124	38.39	-56.151		-6.6773	34.033	-58.142
	-12.636	46.629	-77.116							-3.8792	36.099	-55.294		-5.9386	29.37	-58.362
	-12.591	49.055	-79.023							-3.8501	38.447	-56.697		-6.2783	27.901	-58.297
	-12.56	49.361	-79.756							-3.7814	39.798	-56.186		-6.1936	24.782	-57.893
	-12.539	47.55	-77.152							-3.6505	42.858	-57.598		-5.7018	23.442	-57.927
	-12.524	48.512	-78.724							-3.5352	39.25	-57.469		-6.5191	27.294	-57.598
									OB-15-18-c007-dorsal roots cut	-5.6246	19.766	-34.659		-6.9819	20.392	-36.414
										-4.8442	19.265	-36.141		-6.2364	19.948	-36.366
OB-15-18-c002										-4.7333	19.955	-36.893		-6.2591	19.07	-36.893
	-4.9341	48.35	-57.596		-4.2238	40.637	-51.99			-4.6161	22.545	-36.918		-6.6808	19.839	-37.356
	-4.6611	39.437	-51.888		-3.3326	40.643	-52.118			-4.2069	19.078	-38.701		-5.6123	22.525	-38.974
	-4.6407	41.777	-53.434		-3.7309	40.428	-51.781			-3.7371	20.707	-37.401		-5.0003	23.045	-38.701
	-4.6311	41.45	-53.352		-4.1154	40.166	-51.091			-3.7288	19.373	-36.371		-4.6857	33.034	-36.33
	-4.4543	40.651	-53.193		-3.5375	40.652	-51.455
	-4.4282	36.587	-49.893		-3.9976	40.619	-51.209
	-4.4267	44.035	-54.686		-3.3542	40.835	-51.73		OB-15-18-c008-dorsal roots cut	-13.564	54.368	-57.908		-12.335	48.212	-57.245
	-4.4212	46.452	-56.278		-3.4793	40.68	-51.544			-13.014	51.531	-56.292		-11.886	47.501	-57.908
	-4.3943	38.941	-51.209		-3.5004	40.231	-51.065			-11.551	52.261	-57.266		-11.485	47.475	-57.027
	-4.3913	43.888	-54.904		-3.559	39.684	-51.037			-11.243	48.297	-55.041		-11.084	50.196	-58.466
	-4.3582	42.456	-53.869		-3.8605	39.535	-50.705			-11.196	48.496	-55.424
	-4.2802	39.299	-51.781		-3.5282	38.952	-50.732			-9.7523	48.323	-55.83
	-4.2701	36.776	-50.692		-3.9039	39.858	-50.692			-9.7211	49.636	-55.831
	-4.2677	38.426	-50.42		-3.3357	40.243	-51.047			-9.1472	50.423	-56.527
	-4.252	45.186	-55.562		-3.3882	38.146	-50.506			-8.7824	49.994	-56.464
	-4.2487	34.844	-49.31		-3.5353	39.006	-50.42			-8.0722	51.437	-58.7
	-4.2202	42.044	-53.305		-3.642	38.32	-50.008			-7.633	51.968	-57.949
	-4.1968	41.061	-52.474		-3.3541	38.089	-50.265			-7.5844	56.319	-61.568
	-4.1783	39.859	-51.455		-3.7842	38.452	-49.957			-7.5147	50.194	-57.152
	-4.1716	40.781	-52.469							-7.4937	54.213	-60.988
										-6.8595	55.396	-60.889
										-6.6475	56.585	-61.925
OB-15-18-c003										-6.4577	52.991	-58.667
	-4.2128	4.3321	-35.216		-2.6013	15.007	-34.569			-6.0601	52.839	-58.759
	-4.0394	6.3671	-35.481		-2.5016	14.771	-34.76			-5.9223	26.762	-52.397
	-3.2797	5.6009	-35.203		-2.4292	14.935	-34.894			-5.6999	55.457	-60.828
	-2.8362	6.0444	-34.975		-2.2454	14.875	-34.772
	-2.7903	4.9307	-34.716		-2.1263	15.33	-34.678		OB-15-18-c009-dorsal roots cut
	-2.4037	3.4862	-34.645		-1.95	13.828	-34.641			-4.5786	55.572	-44.524		-3.1843	43.416	-37.007
	-2.0653	5.4725	-34.678		-1.908	14.571	-34.713			-4.1295	51.84	-42.99		-2.8512	42.834	-37.127
	-1.9195	5.3742	-34.641		-1.8742	14.544	-34.808			-4.0995	54.006	-43.996		-2.9406	45.094	-36.854
	-1.6028	4.5312	-34.713		-1.8207	15.3	-34.77			-3.8164	52.885	-43.303		-3.0902	47.416	-36.949
	-1.5877	5.2483	-34.728		-1.5545	16.298	-34.975			-3.7107	50.519	-41.181		-2.9015	48.063	-37.321
	-1.3314	5.3825	-34.74		-1.4801	16.464	-35.355			-3.6853	53.932	-44.349		-2.7945	50.215	-37.55
										-3.6473	53.817	-44.265		-2.546	43.902	-37.401
OB-15-18-c004										-3.5378	50.173	-41.842		-2.7677	48.96	-37.515
	-8.843	29.609	-66.23		-8.3533	21.035	-62.722			-3.4556	52.117	-43.023		-3.0353	51.103	-37.523
	-8.3533	21.035	-62.722		-6.8304	21.581	-63.024			-3.3527	42.027	-36.839
	-7.9725	17.845	-59.349		-7.2907	21.06	-62.32			-3.3397	50.097	-42.193
	-7.7981	17.165	-54.946		-7.6827	21.126	-61.745			-3.3193	56.129	-44.746
	-7.6827	21.126	-61.745		-5.03	20.147	-61.865			-3.2566	48.41	-41.391
	-7.6244	20.055	-61.528		-7.6244	20.055	-61.528			-3.2314	47.55	-41.446
	-7.4385	21.065	-61.44		-7.4385	21.065	-61.44			-3.2159	45.948	-39.387
	-7.2907	21.06	-62.32		-4.2561	22.172	-61.662			-3.2113	44.183	-38.415
	-6.8304	21.581	-63.024		-3.4002	21.624	-61.45			-3.2002	54.905	-44.316
	-6.8264	20.365	-63.517							-3.1598	49.33	-41.823
	-6.8085	22.61	-66.83							-3.149	49.372	-41.681
	-6.5371	20.41	-63.592							-3.1473	43.484	-38.021
	-6.5315	21.148	-63.598
	-6.4887	20.672	-64.007						OB-15-18-c010-dorsal roots cut
	-6.0489	21.936	-63.47							-10.292	28.038	-38.017		-6.3777	26.551	-40.192
	-5.519	21.886	-64.336							-9.718	26.537	-37.31		-4.7466	24.947	-38.253
	-5.03	20.147	-61.865							-9.2184	28.959	-39.244		-7.8509	23.277	-38.017
	-5.0244	21.678	-63.06							-8.4488	32.384	-41.447		-6.113	23.794	-38.168
	-4.8473	21.886	-63.085							-8.3806	31.842	-41.21		-6.8104	23.707	-37.715
	-4.5464	21.851	-63.081							-7.5843	34.683	-42.159		-7.4597	22.356	-37.31
										-7.4321	33.461	-42.25		-7.3846	23.286	-37.873
OB-15-18-c005										-7.3031	32.461	-41.342		-5.9381	24.549	-39.228
	-4.3123	11.191	-44.943		-2.2371	16.531	-44.943							-6.9601	23.863	-39.244
	-4.0961	10.156	-40.734		-1.7157	15.985	-40.734			-6.5705	35.361	-43.265		-4.9299	24.459	-39.351
	-4.3578	8.7953	-38.764							-6.3202	31.155	-37.228
	-4.1349	7.8585	-39.414							-6.1754	35.237	-43.233		-6.2444	26.898	-41.21
										-5.8411	13.477	-32.733		-6.6354	26.232	-40.331
										-5.7773	26.205	-28.311		-6.8197	26.628	-40.483
										-5.6227	27.58	-32.799		-7.4151	26.612	-40.436
										-5.4006	35.615	-41.871		-6.5706	26.602	-41.342
OB-17-15-c003										-5.2817	28.715	-34.513		-5.9123	27.291	-41.512
	-14.856	19.873	-49.506		-9.942	9.925	-40.985
	-13.94	19.385	-49.353		-11.013	7.755	-41.87
					-10.701	7.427	-42.236		OB-17-15-c009
	-13.089	19.229	-49.899		-9.446	7.796	-42.389
					-9.738	7.504	-42.664
	-12.276	16.197	-50.682		-9.543	6.784	-43.396			-11.074	20.176	-41.813		-6.051	10.734	-40.977
	-11.51	20.075	-50.959		-9.105	6.703	-42.969			-10.573	17.381	-39.689		-5.847	10.724	-39.105
	-11.183	19.914	-50.676		-8.755	6.687	-42.511			-10.323	16.593	-37.925		-5.713	10.37	-37.378
					-8.519	6.618	-42.694			-9.747	15.826	-36.212		-5.609	10.168	-35.864
	-11.351	15.657	-49.806		-8.479	6.994	-42.48			-9.338	16.297	-35.248		-5.641	10.258	-34.825
	-10.843	19.797	-49.887		-8.782	6.996	-42.175			-8.653	14.144	-33.95		-5.442	9.908	-33.376
	-10.533	21.236	-49.831		-8.01	6.425	-42.969			-8.704	14.825	-32.403		-5.391	9.563	-31.932
	-10.403	20.694	-49.625		-7.67	7.039	-42.847			-7.999	13.454	-31.765		-5.109	9.386	-31.237
					-6.879	7.403	-43.274			-7.601	14.738	-30.973		-5.094	9.341	-30.642
					-7.376	7.394	-43.091			-7.303	13.48	-30.478		-5.005	9.674	-30.334
					-6.661	7.591	-43.091			-7.007	14.142	-29.645		-4.914	9.674	-29.266
					-7.234	7.201	-43.121			-6.581	12.645	-29.033		-4.858	9.851	-28.711
					-6.647	7.116	-42.969			-6.541	13.662	-28.463		-4.79	10.072	-28.169
					-6.85	6.975	-42.633			-6.172	13.085	-28.008		-4.811	10.295	-27.812
					-6.295	6.736	-42.999			-5.85	14.841	-27.933		-4.652	10.698	-27.91
										-5.29	15.95	-28.157		-4.478	11.299	-27.962
OB-17-15-c006	-7.53	4.799	-37.453							-5.247	15.505	-28.322		-4.805	11.827	-28.123
	-6.692	4.325	-37.04		-4.515	1.71	-35.645			-0.311	0.239	-28.742		-4.664	12.731	-28.844
	-6.072	4.213	-36.531		-4.045	1.54	-35.37			-0.303	0.155	-28.78
	-4.836	2.763	-36.18		-3.558	1.63	-34.821
	-4.994	4.07	-35.869		-3.16	1.784	-34.271		OB-17-15-c010	-8.487	38.999	-55.417		-8.896	26.017	-58.945
	-4.266	4.156	-35.62		-2.864	1.561	-34.241			-9.063	40.009	-54.993		-8.39	26.797	-59.054
	-4.138	4.04	-35.382		-2.609	1.633	-33.997			-8.879	38.912	-54.72		-8.659	26.71	-58.876
	-3.963	4.337	-35.099		-2.554	1.627	-33.661			-8.79	39.062	-54.626		-8.088	26.671	-58.501
	-3.736	4.381	-34.777		-2.372	1.595	-33.417			-8.545	38.513	-54.596		-8.065	26.816	-58.219
	-3.007	2.15	-34.499		-2.13	1.501	-33.234			-8.617	38.624	-54.31		-7.697	26.605	-57.977
	-3.295	4.212	-34.089		-2.098	1.534	-32.837			-8.247	38.506	-54.375		-7.202	26.703	-57.831
	-3.072	3.398	-33.58		-2.153	1.509	-32.41			-8.185	38.445	-54.284		-6.834	26.278	-57.65
					-1.914	1.504	-31.952			-8.226	39.168	-54.03		-7.499	25.643	-57.32
										-8.382	38.707	-53.752		-7.351	25.913	-57.438
OB-17-15-c007	-16.087	19.313	-44.643							-8.612	38.477	-53.644		-7.192	26.713	-57.292
	-15.699	19.304	-43.871		-7.134	9.834	-34.546			-8.41	34.711	-53.327		-7.184	26.843	-56.994
	-14.897	18.947	-43.239		-7.238	7.868	-35.736			-8.555	37.618	-53.182		-6.643	26.377	-56.62
	-14.43	19.048	-42.943		-7.094	7.036	-35.98			-1.189	0.093	-53.407		-5.875	25.008	-56.35
	-13.985	17.265	-42.015		-6.901	6.771	-35.889			-8.252	39.63	-53.18		-3.417	19.868	-56.489
	-13.474	17.532	-41.641		-7.303	4.629	-37.262			-8.067	40.761	-53.151		-0.379	19.915	-56.231
	-13.077	17.105	-41.153		-7.056	4.54	-36.774			-8.353	40.262	-53.018		-7.079	25.422	-55.543
	-12.488	17.572	-40.948		-6.365	4.591	-36.499
	-12.113	17.001	-40.377		-6.323	4.48	-36.438		OB-17-15-c011	-8.592	15.211	-47.377		-3.708	7.004	-47.287
	-11.68	15.786	-40.475		-6.294	4.356	-36.011			-7.791	14.915	-46.897		-3.524	6.882	-46.738
	-11.24	15.707	-40.091		-5.913	4.463	-36.072			-6.866	10.163	-46.326		-3.132	7.214	-46.093
	-10.864	15.748	-39.826		-5.776	4.234	-35.675			-7.515	8.385	-45.128		-4.144	5.988	-45.081
	-10.609	15.727	-39.653		-5.739	4.18	-35.583			-6.787	11.646	-45.215		-3.745	5.96	-45.022
	-10.111	14.761	-39.48		-5.613	4.152	-35.37			-6.487	13.075	-45.027		-2.758	6.824	-45.063
	-9.931	15.673	-39.111		-5.774	4.114	-35.217			-6.302	10.391	-44.235		-4.472	5.538	-43.441
	-9.688	14.817	-38.682		-5.325	4.075	-34.973			-6.056	10.454	-43.535		-3.67	5.577	-43.419
	-9.531	14.456	-38.046		-5.191	3.873	-34.546			-5.553	8.302	-43.58		-3.795	5.482	-42.683
	-9.012	14.395	-37.558		-5.144	3.828	-33.936			-5.538	8.561	-42.466		-2.968	5.454	-42.167
	-8.753	12.67	-37.023		-5.076	3.622	-33.752			-5.347	9.363	-41.742		-3.112	5.067	-41.688
	-8.484	10.254	-36.926		-4.679	3.957	-33.051			-5.435	7.138	-41.196		-2.967	5.029	-40.948
	-8.2	13.956	-36.6		-4.719	3.704	-33.02			-5.399	7.998	-40.286		-3.292	4.49	-40.165
	-8.026	11.627	-36.377		-4.434	3.531	-33.081			-4.932	7.916	-39.837		-3.206	4.576	-39.763
	-7.853	12.624	-36.092		-4.528	3.59	-32.867			-5.044	8.017	-39.664		-3.01	5.108	-39.776
	-7.499	9.744	-35.989		-4.585	3.35	-32.684			-4.409	8.805	-39.628		-3.225	4.771	-39.439
	-7.167	13.341	-35.649							-4.636	7.907	-39.279		-2.863	5.254	-39.312
										-3.868	8.919	-39.192
										-4.06	8.879	-38.817
OB-17-15-c008	-18.421	20.856	-46.826		-10.329	12.376	-34.088			-3.452	8.114	-38.998
	-17.087	20.908	-46.939		-9.859	12.754	-33.997
	-16.492	20.159	-46.557		-9.854	11.508	-34.973
	-16.358	20.233	-46.356		-9.254	11.834	-34.485		OB-17-15-c012	-16.714	22.165	-50.058		-8.681	13.261	-51.561
	-15.155	20.49	-46.491		-9.467	11.682	-34.546			-16.077	25.244	-51.764		-8.584	13.663	-51.627
	-15.487	18.083	-45.396		-8.962	10.569	-34.882			-14.875	24.706	-52.63		-9.773	13.268	-51.72
	-14.32	18.059	-44.67		-9.127	9.305	-35.309			-13.005	29.17	-54.408		-7.837	15.875	-53.9
	-13.903	17.469	-44.996		-9.045	8.533	-36.804			-12.823	27.094	-54.468		-7.542	15.682	-54.073
	-13.469	18.269	-45.521		-8.043	9.809	-35.645			-12.039	28.305	-54.703		-6.868	16.997	-55.571
	-13.204	18.26	-45.054		-8.448	8.642	-36.194			-10.805	31.797	-56.852		-6.676	18.226	-56.526
	-12.789	18.583	-45.194		-7.779	9.433	-36.072			-11.13	32.174	-56.863		-6.817	18.604	-57.087
	-11.895	17.585	-45.478		-7.22	7.154	-38.208			-10.574	30.533	-56.931		-6.43	19.052	-56.863
	-12.069	17.014	-45.151		-7.27	8.477	-36.743			-10.418	34.413	-56.599		-5.798	18.769	-56.519
	-11.121	16.803	-45.306		-7.123	10.363	-35.248			-10.988	29.509	-56.12		-6.734	18.047	-56.163
	-10.905	17.843	-45.675		-7.015	7.634	-37.933			-11.032	30.258	-55.435		-6.287	17.974	-56.457
	-10.582	19.356	-45.937		-7.003	9.018	-36.774			-10.784	27.577	-54.951		-0.972	18.162	-55.882
	-10.282	17.764	-46.023		-6.523	11.36	-34.729			-10.417	32.765	-55.745		-0.952	19.068	-56.36
	-10.122	19.571	-46.03		-6.39	10.578	-35.309			-10.057	31.63	-55.983		-0.658	19.148	-56.196
	-9.987	18.151	-45.769		-6.686	10.648	-35.126			-9.564	30.322	-56.537		-0.441	19.884	-57.176
	-9.572	18.26	-45.665		-6.548	10.817	-34.576			-8.808	30.712	-57.171
	-9.843	17.135	-45.028		-6.6	8.476	-36.407			-9.798	31.98	-56.364
	-9.373	19.039	-45.284							-9.692	28.485	-55.707
										-9.811	29.19	-55.069
										-8.976	28.073	-55.813
