# Supplementary material for: Gap junction-mediated glycinergic inhibition ensures precise temporal patterning in vocal behavior
Source: eLife. 2021 Mar 15;10:e59390. doi: 10.7554/eLife.59390 (PMC7963477; doi:10.7554/eLife.59390)
Supplement: Figure 3—source data 1. [file elife-59390-fig3-data1.xlsx]

## Sheet: VOC first spike vs second spike
This data summarizes the amp,litude between the first VOC spike and the second v´Voc spike
	in mikrovolts
	First VOC spike	second VOC spike
OB-10-02-c007-VMN	28.076	90.027
(more neurons from this one below)	28.381	92.773
	28.992	90.942
	27.771	91.858
	25.024	88.196
	29.297	90.942
	27.466	89.111
	31.433	89.722
	25.33	92.468
	28.076	92.163
	27.771	89.111
OB-11-01-c001-VMN	27.161	61.34
	27.771	61.951
	28.381	62.866
	34.79	60.425
	26.55	61.646
	34.485	61.34
	28.076	66.223
	21.667	64.392
	24.719	64.697
OB-11-01-c002-VMN	44.25	54.932
	39.062	55.847
	36.926	54.321
	40.588	53.101
	39.978	56.152
	41.809	53.711
	39.368	54.016
	40.588	54.932
	40.283	54.016
OB-11-01-c003-VMN	17.7	60.425
	23.804	60.425
	21.667	58.289
	20.142	62.866
	23.499	61.951
	21.362	60.12
	23.804	61.646
	20.447	36.926
	28.076	60.73
	18.005	59.509
	23.804	62.561
OB-11-01-c004-VMN
	36.621	61.951
	37.231	60.425
	30.212	60.12
	36.621	59.814
	35.706	59.814
	32.959	60.425
OB-11-02-c002-VMN	41.199	60.73
(more neurons from this one below)	42.419	61.34
	43.945	60.12
	44.861	65.613
	41.199	57.983
	39.368	64.087
	41.809	63.477
	38.452	66.223
	41.199	62.561
	42.114	61.951
	45.776	62.866
OB-11-03-c001-VMN	45.776	73.242
(more neurons from this one below)	38.757	75.989
	45.776	75.073
	37.537	75.073
	43.945	77.209
	41.199	77.515
	44.861	78.735
	39.368	78.125
	45.471	77.209
	36.011	76.599
	48.523	73.547
	36.621	75.989
OB-10-02-c001-VMN
	26.245	85.754
	24.414	83.313
	24.109	84.534
	23.499	92.468
	27.771	88.501
	21.973	89.417
	27.161	88.501
	26.855	89.722
	28.381	84.534
	27.771	87.891
	23.499	23.499
	21.362	88.501
	23.499	88.196
OB-10-02-c002-VMN	28.687	88.501
	28.381	89.111
	28.992	90.637
	27.161	89.417
	24.109	90.027
	26.855	88.501
	28.076	87.585
	27.466	89.722
	29.907	87.585
	24.719	88.806
	22.888	86.975
	25.94	88.501
	24.109	87.891
OB-10-02-c003-VMN	10.376	87.28
	26.245	89.417
	30.518	86.975
	26.855	87.891
	28.076	87.585
	24.414	87.28
	29.907	89.417
	31.128	87.28
	13.733	85.754
	30.518	85.449
OB-11-03-c003-VMN	56.458	75.684
	53.101	72.937
	52.49	78.735
	59.204	73.242
	55.237	75.378
	51.88	73.242
	51.575	73.853
	51.27	77.515
	56.458	74.463
	56.152	74.463
	55.542	74.768
	57.983	74.463
	50.964	75.378
OB-11-03-c002-VMN	44.861	79.956
	53.101	76.904
	50.354	77.515
	46.387	74.463
	57.983	77.82
	49.133	76.904
	46.387	71.716
	47.913	76.294
	58.899	79.651
	44.861	73.547
	48.523	77.209
	53.406	72.937
	49.438	77.82
OB-11-02-c003-VMN:	36.926	64.697
	41.504	65.918
	40.588	63.171
	42.114	63.477
	36.011	62.561
	35.095	68.359
	36.926	64.392
	36.926	65.613
	37.842	65.918
	36.926	66.833
	36.926	64.697
	34.18	63.477
	36.621	65.613
	39.062	63.782
	38.757	62.561
	39.062	65.613
	39.368	64.392
OB-11-02-c004-VMN:	48.523	83.008
	50.354	85.754
	44.25	86.06
	50.964	87.891
	49.438	84.534
	46.387	86.975
	43.945	85.754
	48.828	84.229
	47.302	82.703
	49.744	84.229
	48.523	88.806
	42.419	83.923
	46.692	85.144
	42.725	86.06

## Sheet: Figure 3
Latency for APs in motoneurons during antidromic stimulation					Latency for HYPs in motoneurons during antidromic stimulation
	Inset in Fig 3 B
	in ms	in ms				in ms	in ms
neuron	ipsilateral stim	contralateral stim
OB-10-02-c007-VMN	2.2	3.9
	2.2	3.7			OB-10-02-c007-VMN	ipsi	contra
	2.2	3.8				10	9.9
	2.2	3.7				10	9
	2.2	3.6				10.8	9
						10.8	10.9
						10.7	10.4
OB-11-01-c001-VMN	1.5	3.7				9.5	10.4
	1.5	4.8				9.5	10.4
	1.5	3.7					10.7
	1.5	3.7					10.7
	1.5	4.8					10.7
					OB-11-01-c001-VMN	10.3	10.3
OB-11-01-c002-VMN	2.2	4.2				10.3	10.3
	2.2	3.6				8.8	9.3
	2.2	3.4				10.8	9.3
	2.2	3.4				8.4	9.3
	2.2	3.4				10.8	9.3
						8.1	9.1
OB-11-01-c003-VMN	1.7	4.2				8.1	9.2
	1.7	3.9					9.2
	1.7	3.6
	1.7	3.4
	1.7	3.4			OB-11-01-c002-VMN	9.2	10.5
						8.8	8.8
OB-11-01-c004-VMN	2.3	3.5				8.8	8.4
	2.3	3.5				9.9	8.9
	2.3	3.5				9.9	8.9
	2.3	3.5				8.4	8.4
	2.3	3.5				8.4	9.3
						8.4	9.3
						8.4
						8.4
OB-11-01-c005-VMN	2.3	3.6
	2.4	3.6			OB-11-01-c003-VMN	10	10.1
	2.5	3.6				10.6	9.4
	2.5	3.6				9.6	9.4
	2.5	3.6				9.6	9.4
						9.6	9.4
						9.6	9.4
						9.5	9.4
						9.5	9.4
OB-11-09-c001-VMN	1.36	3.24				9.7	9.4
	1.36	3.24				9.7	9.4
	1.36	3.24
	1.36	3.24			OB-11-01-c004-VMN	9.3	9.2
	1.36	3.24				9.3	9
	1.26	3.24				9.3	9
						9.3	9
OB-11-09-c002-VMN	0.93	2.1				9.3	9
	0.9	3.1				9.5	8.9
	0.8	3.2				9.5	8.3
	0.84	3.4				9.5	8.3
	1	3.6				9.5	8.3
						9.5	8.3
OB-11-09-c007-VMN	1.3	3.7
	1.4	3.6			OB-11-09-c001-VMN	5.33	5.63
	1.3	3.7				5.53	5.53
	1.3	3.9				5.53	5.04
						5.14	5.43
OB-11-03-c001-VMN	1.9	3.4				5.24	5.3
	1.9	3.4				5.72	5.63
	1.8	3.3
	1.8	3.2			OB-11-09-c002-VMN	5.31	6.5
	1.9	3.2				5.4	6.2
						5.1	6.4
OB-11-03-c003-VMN	2.2	3.9				5.1	6.5
	2.2	3.9				5.7	6.8
	2.2	3.7
	2.2	3.9			OB-11-09-c007-VMN	8.8	9.6
	2.2	3.6				9.3	10.1
						9.1	10.8
						9.1	11.2
					OB-11-03-c001-VMN	6.5	5.9
						6.3	5.5
						6.7	5.62
						6.9	5.9
						6.3	5.92
					OB-11-03-c003-VMN	7.9	8.5
						8.2	8.3
						7.8	8.1
						8.4	7.9
						8.4	8
