# Supplementary material for: Gap junction-mediated glycinergic inhibition ensures precise temporal patterning in vocal behavior
Source: eLife. 2021 Mar 15;10:e59390. doi: 10.7554/eLife.59390 (PMC7963477; doi:10.7554/eLife.59390)
Supplement: Figure 5—source data 1. [file elife-59390-fig5-data1.xlsx]

## Sheet: VOC first spike vs second spike
This data summarizes the amp,litude between the first VOC spike and the second v´Voc spike
	in mikrovolts
	First VOC spike	second VOC spike
OB-10-02-c007-VMN	28.076	90.027
(more neurons from this one below)	28.381	92.773
	28.992	90.942
	27.771	91.858
	25.024	88.196
	29.297	90.942
	27.466	89.111
	31.433	89.722
	25.33	92.468
	28.076	92.163
	27.771	89.111
OB-11-01-c001-VMN	27.161	61.34
	27.771	61.951
	28.381	62.866
	34.79	60.425
	26.55	61.646
	34.485	61.34
	28.076	66.223
	21.667	64.392
	24.719	64.697
OB-11-01-c002-VMN	44.25	54.932
	39.062	55.847
	36.926	54.321
	40.588	53.101
	39.978	56.152
	41.809	53.711
	39.368	54.016
	40.588	54.932
	40.283	54.016
OB-11-01-c003-VMN	17.7	60.425
	23.804	60.425
	21.667	58.289
	20.142	62.866
	23.499	61.951
	21.362	60.12
	23.804	61.646
	20.447	36.926
	28.076	60.73
	18.005	59.509
	23.804	62.561
OB-11-01-c004-VMN
	36.621	61.951
	37.231	60.425
	30.212	60.12
	36.621	59.814
	35.706	59.814
	32.959	60.425
OB-11-02-c002-VMN	41.199	60.73
(more neurons from this one below)	42.419	61.34
	43.945	60.12
	44.861	65.613
	41.199	57.983
	39.368	64.087
	41.809	63.477
	38.452	66.223
	41.199	62.561
	42.114	61.951
	45.776	62.866
OB-11-03-c001-VMN	45.776	73.242
(more neurons from this one below)	38.757	75.989
	45.776	75.073
	37.537	75.073
	43.945	77.209
	41.199	77.515
	44.861	78.735
	39.368	78.125
	45.471	77.209
	36.011	76.599
	48.523	73.547
	36.621	75.989
OB-10-02-c001-VMN
	26.245	85.754
	24.414	83.313
	24.109	84.534
	23.499	92.468
	27.771	88.501
	21.973	89.417
	27.161	88.501
	26.855	89.722
	28.381	84.534
	27.771	87.891
	23.499	23.499
	21.362	88.501
	23.499	88.196
OB-10-02-c002-VMN	28.687	88.501
	28.381	89.111
	28.992	90.637
	27.161	89.417
	24.109	90.027
	26.855	88.501
	28.076	87.585
	27.466	89.722
	29.907	87.585
	24.719	88.806
	22.888	86.975
	25.94	88.501
	24.109	87.891
OB-10-02-c003-VMN	10.376	87.28
	26.245	89.417
	30.518	86.975
	26.855	87.891
	28.076	87.585
	24.414	87.28
	29.907	89.417
	31.128	87.28
	13.733	85.754
	30.518	85.449
OB-11-03-c003-VMN	56.458	75.684
	53.101	72.937
	52.49	78.735
	59.204	73.242
	55.237	75.378
	51.88	73.242
	51.575	73.853
	51.27	77.515
	56.458	74.463
	56.152	74.463
	55.542	74.768
	57.983	74.463
	50.964	75.378
OB-11-03-c002-VMN	44.861	79.956
	53.101	76.904
	50.354	77.515
	46.387	74.463
	57.983	77.82
	49.133	76.904
	46.387	71.716
	47.913	76.294
	58.899	79.651
	44.861	73.547
	48.523	77.209
	53.406	72.937
	49.438	77.82
OB-11-02-c003-VMN:	36.926	64.697
	41.504	65.918
	40.588	63.171
	42.114	63.477
	36.011	62.561
	35.095	68.359
	36.926	64.392
	36.926	65.613
	37.842	65.918
	36.926	66.833
	36.926	64.697
	34.18	63.477
	36.621	65.613
	39.062	63.782
	38.757	62.561
	39.062	65.613
	39.368	64.392
OB-11-02-c004-VMN:	48.523	83.008
	50.354	85.754
	44.25	86.06
	50.964	87.891
	49.438	84.534
	46.387	86.975
	43.945	85.754
	48.828	84.229
	47.302	82.703
	49.744	84.229
	48.523	88.806
	42.419	83.923
	46.692	85.144
	42.725	86.06

## Sheet: CBX
		Control										Carbenoxolone treatment
	Vocal				antidromic						Vocal				antidromic
	in mV	difference to RMP in mV			in mV	difference to RMP in mV					in mV	difference to RMP in mV				in mV	difference to RMP in mV
Cell										Cell
OB-17-10-c001	RMP	AHP	AP		RMP	AHP	AP			OB-17-10-c006-CBX	RMP	AHP_amp	AP_amp			RMP	AHP_amp	AP_amp
	-54.274	-4.259	31.385		-53.921	-2.4446	14.401				-43.622	-0.17035	16.37			-33.097	0.01621	8.378
	-54.794	-4.38	32.15		-54.6	-0.60639	14.927				-42.95	-0.44622	16.186			-33.462	0.28919	8.59
	-54.922	-4.465	30.752		-53.481	-2.9461	13.869				-42.208	-0.57771	16.756			-33.711	0.2946	8.4733
	-55.06	-4.0218	32.538		-53.814	-2.8572	13.958				-41.843	-0.88167	15.354			-33.442	0.14726	8.326
	-54.958	-4.3072	30.971		-53.614	-2.7518	13.88				-41.233	-1.0033	15.232			-33.726	0.24833	8.4576
	-54.878	-4.1124	27.26		-53.523	-2.5984	13.606				-41.134	-1.0104	14.889			-33.78	0.18044	8.5423
	-54.977	-4.4717	30.288		-54.129	-2.1456	14.303				-41.006	-0.89442	15.127			-33.706	0.28965	8.5294
	-55.024	-4.2415	32.135		-54.017	-1.8304	14.252				-41.151	-0.6272	14.723			-34.044	0.32238	8.6232
	-55.384	-3.9731	25.751		-53.628	-1.9441	13.925				-40.863	-1.0371	15.259			-34.149	0.24384	8.2394
	-55.592	-4.1917	29.256		-53.887	-2.082	14.184				-40.677	-0.9796	13.943			-33.858	0.31948	8.1015
	-55.925	-4.2254	32.396		-54.024	-1.4879	14.717				-40.577	-0.8967	14.911
										OB-17-10-c007-CBX	RMP	AHP_amp	AP_amp			-60.793	1.0399	36.013
											-56.551	-3.7212	43.184			-60.824	1.1314	35.86
OB-17-10-c002	-48.11	-5.7224	21.865		-47.614	-3.9001	8.1238				-55.728	-3.9029	40.988			-61.848	1.0263	37.037
	-47.756	-5.8327	21.084		-47.275	-3.6585	7.572				-55.331	-4.1785	40.255			-61.066	0.73273	34.546
	-48.322	-5.1449	20.581		-47.527	-3.8648	8.1897				-55.77	-4.1969	40.939			-60.63	0.81568	33.531
	-48.089	-5.1338	23.095		-47.526	-3.5906	8.6165				-56.39	-3.0586	41.039			-61.248	0.70114	34.27
	-47.821	-4.9748	21.148		-47.303	-3.4783	7.9353				-56.404	-3.3796	40.535			-61.622	1.0145	34.981
	-47.767	-4.8458	22.284		-47.463	-3.1963	8.3699				-56.436	-3.2865	40.048			-60.666	0.82093	33.719
	-48.003	-4.5174	21.178		-47.853	-3.2026	8.2415				-56.505	-2.9432	40.636			-61.012	0.86187	33.973
	-48.405	-4.0245	21.641		-48.152	-2.9042	8.4178				-58.105	-2.1674	42.327			-61.238	0.75168	34.474
	-48.381	-3.8651	21.495		-47.859	-2.8611	8.2168				-57.792	-2.0228	43.418			-60.406	0.92702	33.489
	-48.229	-3.8955	21.465		-47.498	-2.8868	8.191				-57.3	-2.5146	42.438			-60.602	0.78722	33.472
	-48.161	-3.7497	21.275		-47.637	-2.9002	8.4219
										OB-17-10-c008-CBX	RMP	AHP_amp	AP_amp
											-38.111	-6.506	10.889			-37.678	0.019711	5.2382
OB-17-10-c003	-34.865	-6.1806	9.0171		-35.626	-1.6365	34.527				-38.172	-6.3533	10.798			-37.907	0.30929	5.7109
	-35.122	-6.0461	9.4873		-35.367	-2.0783	38.296				-37.522	-6.5452	10.087			-37.898	0.23904	5.6101
	-35.767	-5.9807	10.285		-35.664	-4.4056	32.124				-37.725	-6.2203	10.809			-37.985	0.17397	5.5145
	-36.19	-5.4973	10.311		-36.164	-3.9972	29.084				-37.396	-6.1526	10.357			-38.279	0.43722	5.6862
	-36.172	-5.4236	9.7131		-36.108	-4.0532	7.0247				-37.355	-5.8882	10.347			-38.299	0.12116	5.3397
	-36.374	-5.2522	10.495		-35.711	-3.9309	4.1563				-37.2	-5.8302	10.71			-38.236	0.11979	5.674
	-36.666	-5.2341	11.459		-36.581	-3.4278	10.122				-37.032	-5.9364	10.482			-38.629	0.45129	5.7614
	-36.718	-5.0913	10.442		-36.673	-3.6411	4.385				-37.184	-5.6625	10.725			-38.972	0.0010655	5.3722
	-36.706	-4.8585	10.095		-36.535	-3.168	4.1563				-36.687	-5.7324	10.747			-39.043	0.10289	5.535
	-36.864	-4.8839	10.009		-36.753	-3.0725	4.5874				-36.8	-5.4059	10.128			-39.073	0.40769	6.0229
	-36.096	-5.2244	11.194		-36.48	-3.4671	4.2539
	-35.942	-5.0122	9.2701		-36.088	-3.5851	4.2884
										OB-17-10-c009-CBX	-58.306	-2.7595	25.073			-57.61	0.42032	18.761
											-57.573	-3.0348	24.95			-56.833	0.25343	18.167
OB-17-10-c004	-54.481	-7.7141	31.898		-55.256	-5.4744	18.116				-57.665	-2.8819	25.011			-56.7	0.45578	18.186
	-55.938	-6.9897	32.988		-55.323	-4.8276	20.014				-56.262	-3.0032	24.92			-54.767	0.4761	17.535
	-55.835	-7.2753	34.015		-54.629	-5.8572	19.686				-55.002	-3.7746	24.118			-54.174	0.40183	16.973
	-55.051	-7.2656	32.712		-54.708	-4.74	19.949				-54.578	-4.0157	23.023			-54.171	-0.18082	16.482
	-55.534	-7.0573	33.562		-55.348	-4.4965	20.65				-54.618	-3.3963	23.185			-53.375	0.48836	16.419
	-55.91	-7.1694	33.968		-54.146	-5.6993	19.264				-53.021	-3.7717	23.297			-52.356	0.17116	15.521
	-54.858	-7.0319	31.664		-54.09	-5.7247	16.95				-52.535	-4.0136	22.201			-52.008	0.28097	15.875
	-55.195	-6.878	31.727		-54.461	-5.628	17.138				-53.179	-3.1867	22.173			-52.253	0.18957	15.937
	-55.215	-6.7658	32.449		-52.198	-4.4125	10.511				-51.747	-3.8555	22.023			-51.047	0.083029	15.403
	-55.127	-6.702	33.184		-52.45	-4.4042	10.733
	-55.058	-6.7093	32.414		-53.115	-4.0444	11.367			OB-17-10-c010-CBX
											-58.306	-2.7595	25.073			-57.61	0.42032	18.761
											-57.573	-3.0348	24.95			-56.833	0.25343	18.167
OB-17-10-c005	RMP	AHP_amp	AP_amp		RMP	AHP_amp	AP_amp				-57.665	-2.8819	25.011			-56.7	0.45578	18.186
	-51.138	-0.55903	26.205		-50.483	-2.0075	16.974				-56.262	-3.0032	24.92			-54.767	0.4761	17.535
	-51.004	-0.84553	27.231		-50.481	-2.0094	16.881				-55.002	-3.7746	24.118			-54.174	0.40183	16.973
	-51.074	-0.71481	26.629		-50.196	-2.1719	16.963				-54.578	-4.0157	23.023			-54.171	-0.18082	16.482
	-51.165	-0.62371	26.415		-50.601	-2.1331	17.154				-54.618	-3.3963	23.185			-53.375	0.48836	16.419
	-51.098	-0.72119	27.263		-50.596	-2.047	17.118				-53.021	-3.7717	23.297			-52.356	0.17116	15.521
	-51.39	-1.0086	26.915		-50.916	-1.4518	17.5				-52.535	-4.0136	22.201			-52.008	0.28097	15.875
	-51.052	-0.79725	25.539		-50.614	-2.0287	15.733				-53.179	-3.1867	22.173			-52.253	0.18957	15.937
	-51.09	-0.69856	27.317		-50.535	-1.9553	17.088				-51.747	-3.8555	22.023			-51.047	0.083029	15.403
	-51.352	-0.5891	27.67		-50.792	-1.9734	17.009
	-51.321	-0.61992	26.541		-50.795	-2.1833	17.104
	-51.351	-0.62083	27.547		-50.61	-2.0329	17.193
										OB-15-19-c008-10mM CBX	-47.428	-4.7266	22.892			-46.776	-0.70959	15.068
											-47.093	-4.8483	22.495			-47.187	-0.54292	15.448
											-46.877	-5.3999	21.608			-47.145	-0.55426	15.04
OB-15-19-c001											-46.966	-4.8835	22.369			-47.553	-1.1835	15.449
											-46.776	-5.3177	22.362			-49.482	0.28737	18.049
	-68.183	-14.459	25.336		-72.243	-3.837	12.978				-47.187	-5.2426	22.162			-49.351	-0.1175	17.827
	-68.223	-14.419	22.264		-73.232	-5.0763	14.485				-47.145	-5.1624	22.487			-49.733	-0.529	18.209
	-68.163	-14.021	24.461		-73.51	-5.5911	14.459				-47.553	-5.2423	22.62			-49.85	0.04551	19.272
	-68.732	-14.185	25.549		-73.87	-5.3837	14.88				-49.482	-3.741	24.885			-50.279	-0.37968	20.342
	-68.716	-13.621	23.885		-74.573	-5.047	14.972				-49.351	-4.2679	25.853			-50.846	-0.026865	19.657
	-69.581	-13.519	26.337		-75.392	-5.9378	16.218
	-69.668	-13.462	24.533		-76.969	-6.008	17.521
	-70.481	-13.229	25.986		-77.978	-6.0983	18.407
	-70.536	-13.326	26.164		-79.223	-5.4636	20.019			OB-15-19-c009-10mM CBX
	-71.1	-12.518	24.958		-79.099	-6.3804	19.712				-29.259	-0.98379	11.315			-29.259	-0.28189	8.8124
											-29.114	-1.0674	11.109			-29.114	0.092238	9.0644
											-28.555	-0.92481	10.916			-28.555	-3.3052	8.1999
											-28.048	-0.76066	11.141			-28.048	0.12435	8.9134
OB-15-19-c003	-51.624	-13.714	31.055		-60.146	-4.9178	28.468				-27.644	-0.27983	10.218			-27.644	-3.4842	9.3027
	-51.226	-13.563	29.589		-59.349	-6.3552	28.008				-26.203	-0.25609	10.059			-26.203	0.4153	8.9297
	-52.22	-13.576	31.071		-60.318	-4.5931	28.671				-24.489	-0.35221	9.2913			-24.489	0.16659	8.3758
	-51.708	-13.569	29.461		-59.778	-5.9877	28.436				-23.712	-0.092162	9.3988			-23.712	0.30457	8.1171
	-52.697	-12.58	31.701		-60.283	-5.2685	29.796				-22.812	-0.1981	9.0182			-22.812	0.62588	7.0956
	-53.274	-12.888	30.997		-60.018	-6.0217	28.799				-18.747	0.74133	8.3402			-18.747	2.6029	11.606
	-53.962	-12.567	32.355		-60.493	-4.6618	29.64
	-56.921	-12.079	34.766		-59.996	-6.0745	28.96			OB-15-19-c011-10mM CBX
	-60.146	-11.571	38.753		-60.178	-4.8852	29.295				-30.152	-0.12169	20.752			-57.05	-1.6048	20.185
	-60.178	-11.08	39.487		-59.787	-4.4217	28.934				-29.856	-0.020396	20.121			-56.886	-0.36461	20.082
	-60.654	-11.124	39.566		-60.654	-5.0812	29.587				-29.189	0.014688	18.6			-56.816	-0.34361	19.554
											-29.235	-0.15388	17.882			-56.864	0.13212	20.396
OB-15-19-c004											-27.861	-0.39787	15.105			-56.414	-0.31842	20.006
	-41.113	-14.154	11.542		-49.252	-4.8556	11.99				-25.365	0.03554	10.015			-56.39	-0.098402	19.128
	-41.881	-15.156	13.317		-50.028	-5.4838	12.125									-55.672	-0.48029	19.722
	-41.604	-15.403	16.336		-49.964	-5.5166	11.939									-55.7	-0.4223	20.269
	-41.502	-14.345	15.196		-49.468	-5.5243	11.657									-55.931	-0.12999	20.073
	-42.727	-14.83	18.312		-50.785	-6.5882	11.722									-55.791	-0.33105	20.665
	-42.553	-13.935	16.338		-51.069	-4.8999	13.105									-55.77	-0.53455	20.095
	-42.997	-13.43	17.149		-51.928	-5.9944	12.957
	-42.369	-13.448	12.309		-52.807	-4.9929	13.836			OB-15-19-c012-10mM CBX
	-44.003	-12.424	15.836		-54.009	-5.8059	14.641				-50.436	-1.169	8.5051			-45.176	-0.75282	7.2733
	-42.767	-14.087	18.872		-47.894	-4.5653	11.304				-50.952	-1.5386	8.6543			-46.492	-0.47435	8.4978
	-43.755	-13.801	18.151		-48.336	-3.2384	12.387				-50.858	-0.96043	7.676			-46.399	-1.0257	8.2211
											-50.766	-1.4191	8.2855			-47.247	-1.703	9.8632
OB-15-19-c005											-50.982	-1.5994	8.7766			-47.768	-0.5414	10.048
	-44.641	-10.046	25.751		-44.737	-4.2438	13.67				-51.181	-1.248	7.9988			-47.568	-0.95541	8.9933
	-45.211	-9.2323	28.426		-44.45	-4.5919	15.611				-51.367	-1.0317	8.8865			-49.466	0.69932	11.228
	-44.65	-0.27207	1.4674		-44.852	-3.1825	16.471				-51.004	-1.1806	9.1954			-48.136	-0.32626	9.592
	-44.737	-8.5163	27.464		-44.863	-4.514	13.156				-51.641	-1.246	7.7567			-48.006	-1.4931	8.7608
	-44.852	-9.1029	26.999		-44.147	-4.0099	13.568				-51.256	-1.0821	8.6835			-47.598	-0.43661	9.5426
	-44.147	-8.8622	27.911		-44.44	-5.0595	13.892
	-45.073	-8.7595	28.075		-45.073	-3.4495	13.61
	-44.599	-8.1657	27.113		-44.739	-4.15	14.161			OB-15-19-c013-10mM CBX
	-42.949	-7.8631	27.018		-44.599	-3.3134	13.685				-51.183	-2.9556	25.548			-51.099	-0.23189	21.619
	-40.749	-7.4078	25.368		-44.236	-2.9441	13.902				-50.672	-2.7333	20.246			-50.837	-0.31012	21.296
	-40.483	-7.7345	23.149		-42.949	-2.5836	13.652				-50.914	-2.6138	22.533			-50.61	0.072603	20.886
											-50.324	-2.868	21.516			-50.408	-0.52565	20.837
											-51.07	-2.9154	22.658			-51.008	-0.96378	21.65
OB-15-19-c006											-50.773	-2.3882	24.071			-51.037	-0.38501	13.439
											-51.125	-2.6466	23.66			-51.588	0.16606	22.261
	-60.716	-13.716	35.295		-60.066	-6.8586	18.685				-51.099	-2.5207	24.67			-51.185	-0.5118	21.949
	-61.044	-13.541	37.271		-60.716	-5.5679	19.304				-50.837	-2.0496	22.364			-51.669	-0.088509	22.372
	-60.785	-13.037	36.86		-61.091	-6.5058	19.922				-50.675	-2.6694	22.08			-51.165	-0.50129	21.593
	-60.368	-13.27	38.243		-61.044	-4.8432	19.601				-50.408	-2.3567	19.982			-51.126	-1.0594	21.859
	-60.724	-12.915	39.3		-60.485	-6.7758	19.195				-51.065	-2.4628	23.019			-51.344	-0.23113	21.864
	-60.785	-12.518	38.782		-60.785	-5.4989	20.166
	-60.707	-12.596	39.498		-60.912	-6.8374	20.171
	-60.396	-12.45	41.139		-60.368	-4.8476	19.628
	-60.584	-12.139	41.297		-60.807	-6.6067	20.584
	-60.487	-11.596	40.376		-60.724	-5.591	20.471
	-61.006	-11.626	41.292		-60.785	-5.2856	20.593
:OB-15-23-c008										OB-15-23:OB-15-23-c014
	RMP	AHP_amp	AP_amp		-46.652	-2.5733	24.557				RMP	AHP_amp	AP_amp			-42.146	0.33706	3.9381
	-44.975	-1.7472	10.124		-47.324	-2.816	25.23				-42.146	-0.029151	3.9381			-42.279	0.53079	4.0708
	-45.431	-1.7797	10.244		-47.985	-2.2465	26.532				-42.279	0.011994	4.0708			-42.388	0.45716	4.1803
	-47.128	-1.12	12.033		-48.093	-1.9556	25.724				-42.388	-0.061642	4.1803			-42.474	0.48206	4.0221
	-46.827	-0.81122	11.396		-47.841	-2.8796	25.868				-42.474	-0.006225	4.0221			-42.63	0.42421	4.1474
	-45.874	-1.3976	11.786		-47.767	-2.2515	26.099				-42.63	0.027481	4.1474			-42.787	0.45913	4.3043
	-45.389	-1.9437	11.576		-48.022	-2.3319	26.843				-42.787	0.12344	4.1518			-42.948	0.46794	4.1911
	-47.073	-1.3584	12.313		-47.423	-3.0838	26.732				-42.948	0.071208	4.1911			-43.126	0.34025	4.3686
	-46.652	-1.3832	11.953		-48.03	-2.8119	27.462				-43.126	0.096108	4.3686			-42.963	0.26934	4.3892
	-47.324	-1.2596	12.87		-47.431	-3.442	26.801				-42.963	-0.005314	4.3892			-43.072	0.31671	4.0093
	-47.985	-0.81213	13.134		-47.245	-3.4145	26.004				-43.072	-0.049496	3.9788			-43.018	0.23245	4.3218
										OB-15-23:OB-15-23-c015
:OB-15-23-c009											-29.915	-0.32795	2.7543			-29.915	-0.053292	6.5995
	-57.388	-7.2791	31.783		-57.388	-7.4622	39.016				-30.043	-0.26054	2.5166			-30.043	0.10567	7.552
	-55.801	-10.361	33.34		-55.801	-10.361	37.368				-29.62	-0.25629	7.1595			-29.62	-0.073181	7.1595
	-55.712	-8.8636	31.298		-55.712	-8.8636	38.561				-29.173	-0.15395	6.9566			-29.173	0.27329	6.9566
	-56.476	-8.6787	35.267		-56.476	-8.6787	38.624				-29.212	-0.66455	2.1125			-29.212	-0.54248	6.6291
	-55.979	-7.894	32.816		-55.979	-7.894	38.798				-28.547	0.13558	7.3377			-28.547	0.47128	7.3377
	-55.151	-7.2269	32.843		-55.151	-7.2269	37.756				-28.328	-0.11448	2.6626			-28.328	0.16018	5.928
	-55.339	-7.0392	31.474		-55.339	-7.0392	39.317				-27.774	0.21681	6.5645			-27.774	0.27785	6.5645
	-52.807	-8.6246	31.17		-52.807	-8.6246	37.671				-27.325	-0.38504	6.0237			-27.325	0.16428	6.0237
	-53.166	-7.4721	32.475		-53.166	-7.8383	36.138				-27.687	0.069082	2.6326			-27.687	0.40478	6.4473
	-54.201	-7.5359	30.764		-54.201	-7.5359	36.989				-27.238	-0.22759	6.1811
:OB-15-23-c011	-59.78	-11.661	29.843		-59.78	-13.889	31.063			OB-15-23-c021	-44.324	-0.59775	3.9494			-50.163	-0.95394	2.0368
	-59.29	-11.388	28.62		-59.29	-13.524	29.688				-44.013	-1.0915	4.188			-49.955	-1.8948	1.4011
	-58.433	-11.147	28.068		-58.433	-13.68	28.068				-44.19	-0.57953	3.2962			-49.935	-0.41874	1.809
	-57.853	-10.995	27.823		-57.853	-13.406	27.823				-44.076	-0.72422	3.7313			-50.401	-1.7231	1.1761
	-57.343	-11.352	27.314		-57.343	-13.061	27.314				-44.53	-0.36135	3.5754			-51.033	0.25128	2.2654
	-56.706	-11.654	26.371		-56.706	-12.691	26.371				-44.459	-0.98203	4.2975			-50.961	-0.49132	1.3703
	-56.553	-10.86	26.28		-56.553	-12.722	26.28				-44.916	-0.31095	3.5648			-51.49	-1.7635	1.3188
	-56.247	-10.128	26.432		-56.247	-12.692	26.432				-45.282	-0.55539	3.534			-52.104	-0.5689	1.8725
	-55.664	-10.804	25.94		-55.664	-12.299	25.94				-47.051	-0.55645	4.9367			-52.002	-0.64102	1.5562
	-55.195	-10.265	25.197		-55.195	-12.096	25.197				-47.508	-0.22137	5.0277			-52.348	-0.11144	1.5975
	-55.325	-9.769	23.251		-55.325	-11.356	23.251
	-54.459	-9.8109	24.46		-54.459	-11.947	24.46
	-54.368	-9.8107	25.162

## Sheet: QX314
									after QX314 injection
		Control pre QX314 injection
		Vcoal			Antidromic					Vcoal			Antidromic
	RMP	Hyp	AP		RMP	Hyp	AP		RMP	Hyp	AP		RMP	Hyp	AP
OB-10-03-c016-qx314	-44.6	-6.8	40.9		-44.6	-10.7	34.3		-38.2	-5.1	27.1		-38.2	-11	12.3
	-44.7	-8.8	38.4		-44.7	-11.1	32.3		-36.6	-6.6	25.3		-36.6	-11.7	12
	-44.3	-10.2	37.4		-44.3	-12	38.1		-36.5	-7.9	24.4		-36.5	-11	12
	-43.9	-11.4	36.7		-43.9	-10.3	39.3		-35.9	-8.4	24		-35.9	-10.3	11.5
	-42.1	-12.3	36.2		-42.1	-11.4	38.4		-35.6	-8.1	24.4		-35.6	-11	12.5
OB-10-03-c017-qx314	-60.4	-11.3	38		-60.4	-0.7	38.8		-36	-2.1	21.5		-36	-5.5	12.2
	-58.8	-12.6	36.7		-58.8	-13.6	37.6		-36.5	-1.5	21.7		-36.5	-6.3	11.6
	-58.8	-11.8	37.1		-58.8	-2.6	37.6		-36.1	-2	21		-36.1	-7.2	10.8
	-58.9	-11.4	37.2		-58.9	-3.8	38.3		-36.6	-2	20.9		-36.6	-8.2	10.3
	-59.4	-11	36.9		-59.4	-2.9	37.4		-37.2	-2	21		-37.2	-7	10.7
OB-11-08-c009-VMN-qx314	-44.7919	-11.2079	24.3146		-44.7919	-0.3741	11.0089		-52.442	-0.4144	25.0372		-52.442	-0.2924	5.2008
	-45.3412	-10.1092	23.338		-45.3412	-0.5878	11.4057		-52.1709	-0.8992	24.8271		-52.1709	-0.3193	4.655
	-45.8151	-9.5133	24.88		-45.8151	-0.419	11.6964		-52.1362	-1.0254	29.4006		-52.1362	-0.3235	4.5288
	-44.6928	-10.4525	26.7485		-44.6928	-0.5037	10.6047		-52.099	-0.6049	25.976		-52.099	-0.2692	4.0033
	-45.318	-9.2474	23.7421		-45.318	-0.3973	10.8942		-51.8696	-0.6512	25.2888		-51.8696	-0.5596	3.896
OB-11-08-c010-VMN-qx314	-51.8799	-10.3149	25.3296		-51.8799	-0.5798	9.7351		-53.5641	-3.4427	24.8165		-53.5641	-0.7877	4.8886
	-51.3082	-10.5509	24.117		-51.3082	-0.6022	9.1024		-51.9825	-4.1088	18.8709		-51.9825	-1.759	3.0628
	-51.9461	-9.6079	28.5696		-51.9461	-0.3915	9.0384		-53.0777	-3.5324	28.511		-53.0777	-0.7553	4.1885
	-53.3371	-9.407	31.7001		-53.3371	-0.618	9.6054		-52.5841	-3.0494	19.8693		-52.5841	-0.7301	4.0612
	-52.9346	-8.955	25.774		-52.9346	-0.6237	9.0198		-53.0737	-2.9566	22.2815		-53.0737	-1.3391	5.1611
OB-11-08-c011-VMN-qx314	-49.9301	-9.7318	30.5209		-49.9301	-0.546	11.2948		-42.55	-4.0503	23.6291		-42.55	-0.3882	2.8771
	-49.754	-9.328	29.704		-49.754	-0.5695	10.661		-42.6616	-3.0842	15.5315		-42.6616	-0.5513	2.7751
	-49.6618	-9.054	29.1235		-49.6618	-0.6007	9.9889		-42.6094	-3.5027	19.7823		-42.6094	-0.4509	2.8145
	-49.6346	-9.2338	29.7677		-49.6346	-0.5973	9.565		-42.3634	-3.3824	15.63		-42.3634	-0.3612	2.7821
	-49.5987	-8.7204	30.7694		-49.5987	-0.4501	9.4681		-42.0596	-3.259	13.0984		-42.0596	-0.5124	2.7835
OB-11-08-c012-VMN-qx314	-49.7742	-10.1928	30.7312		-49.7742	-1.9531	13.0616		-53.8781	-4.38	30.0134		-53.8781	-0.3211	3.9513
	-49.5475	-10.8163	27.5443		-49.5475	-1.7525	12.194		-53.7647	-4.3103	33.1653		-53.7647	-0.3735	3.8685
	-48.7876	-10.8743	26.2961		-48.7876	-1.5969	11.3425		-53.6666	-3.2487	27.0553		-53.6666	-0.5937	1.5426
	-48.7455	-10.0008	29.5194		-48.7455	-1.7611	10.6596		-53.6566	-3.9301	32.4469		-53.6566	-0.3595	3.7604
	-48.809	-9.7848	26.7753		-48.809	-1.6671	10.2653		-53.8418	-3.7449	32.6931		-53.8418	-0.449	3.8845
OB-11-08-c013-VMN-qx314	-58.9358	-5.9141	33.3621		-58.9358	-0.543	17.615		-63.2672	-2.4371	33.8177		-63.2672	-0.6671	2.5372
	-59.0884	-5.6089	34.949		-59.0884	-0.3904	17.6455		-63.0281	-2.4931	34.4636		-63.0281	-0.4179	1.0774
	-58.8128	-5.2131	33.8799		-58.8128	-0.4829	17.7056		-62.8662	-2.6245	33.9966		-62.8662	-0.3052	0.6714
	-58.6683	-5.9984	34.7425		-58.6683	-0.6579	17.317		-63.3721	-2.2102	34.7466		-63.3721	-0.5317	1.0857
	-59.135	-4.6773	35.2703		-59.135	-2.0833	17.8752		-63.3206	-2.2922	35.4275		-63.3206	-0.4917	8.9993
Ob-10-03-c019
baseline not stable!	RMP	AHP_amp	AP_amp		-66.507	-4.4766	24.698		RMP	AHP_amp	AP_amp
	-62.985	-9.7694	34.39		-65.554	-9.916	24.996		-45.419	-0.50987	20.883		no antidromic in this experiment
	-63.73	-8.597	35.409		-64.875	-3.5148	23.951		-45.498	-0.21751	18.154
	-64.142	-9.0084	34.51		-65.247	-3.4785	23.835		-45.028	-0.93163	18.508
	-65.037	-8.4803	36.442		-64.971	-4.4872	23.345		-44.454	-0.49843	20.528
	-65.232	-7.9185	38.041		-63.722	-3.8129	25.24		-43.716	-0.99236	19.454
	-65.592	-7.7117	38.767		-62.986	-3.4206	22.153
	-66.004	-8.0012	37.897		-63.821	-3.409	22.256
	-65.639	-8.3359	38.417		-63.385	-9.2165	22.308
