# Supplementary material for: Gap junction-mediated glycinergic inhibition ensures precise temporal patterning in vocal behavior
Source: eLife. 2021 Mar 15;10:e59390. doi: 10.7554/eLife.59390 (PMC7963477; doi:10.7554/eLife.59390)
Supplement: Figure 7—figure supplement 1—source data 1. [file elife-59390-fig7-figsupp1-data1.xlsx]

## Sheet: Figure 7-Supp1 a
	This is the hyperpolarizaiton seen at subthresold for vocal activity
		baseline	hyperpol		difference in mV		Averages per neuron
	OB-10-02-c001	-64.1	-66.2		-2.1		-2.1
	OB-10-01-c004	-60.9	-63.3		-2.4
		-61.1	-63.7		-2.6
		-60.4	-63.2		-2.8
		-60.7	-62.8		-2.1
		-60.9	-62.9		-2
		-60.5	-62.5		-2
							-2.31667
	OB-10-01-c0017	-41.7	-42.8		-1.1
		-42.4	-43.7		-1.3
							-1.2
	OB-10-02-c003	-53.4	-56.2		-2.8
	offset potential	-56.5	-60.9		-4.4
		-59.9	-62.4		-2.5
		-62.7	-65.9		-3.2
		-65.6	-69.3		-3.7
		-68.6	-72.7		-4.1
							-3.45
	OB-10-02-c004	-66.2	-69.1		-2.9
		-66.2	-69.5		-3.3
		-65.9	-68.1		-2.2
		-66.2	-68.6		-2.4
		-66.3	-69.6		-3.3
		-67.1	-69.5		-2.4
							-2.75
	OB-10-02-c005	-54	-57.04		-3.04
	offset potential removed	-55.1	-57.8		-2.7
		-56.7	-58.7		-2
		-57.8	-60.3		-2.5
		-58.7	-60.7		-2
							-2.448
	OB-10-02-c006	-66.9	-70.1		-3.2
		-67.7	-70.6		-2.9
		-68.1	-71.2		-3.1
		-68.6	-71.9		-3.3
		-69.2	-72.3		-3.1
							-3.12
						Average	-2.48352
						Standarddeviation	0.679686

## Sheet: Figure 7-Supp1 b and c
Vocalization behavior					Vocalization behavior							Antidromic
before chloride injection					after chloride injection
		before				after injection						before injection					after
OB-10-02-c009-VMN-chloride					OB-10-02-c009-VMN-chloride						OB-10-03-c008-VMN-chloride
	RMP_neuron	MAXdepol_neuron	MINhyperpol_neuron			RMP_neuron	MAXdepol_neuron	MINhyperpol_neuron				RMP_neuron	MAXdepol_neuron	MINhyperpol_neuron			RMP_neuron	MAXdepol_neuron	MINhyperpol_neuron
	-57.162	25.058	-16.232			-46.496	17.504	0.50552				-78.956	26.344	-5.2418			-100	24.103	-6.3842
	-58.177	25.919	-13.784			-46.001	18.443	0.49908				-95.307	24.506	-6.9879			-100.9	24.334	-6.1533
	-57.859	25.571	-14.437			-47.008	18.962	1.0181				-102.98	23.996	-7.8953			-100.46	24.262	-6.3773
	-58.044	24.169	-13.489			-46.194	17.751	0.47818				-106.71	23.885	-7.6096			-100.25	24.473	-6.075
	-57.802	26.155	-12.968			-46.944	19.295	1.4728				-107.5	22.969	-8.0068			-100.39	20.463	-5.9958
	-57.604	24.92	-12.22			-46.222	17.382	0.38419				-107.24	22.947	-8.3949			-100.14	14.261	-5.3316
	-57.184	22.912	-12.763			-47.016	19	0.90344				-106.97	23.378	-7.9025			-99.92	19.414	-6.1593
	-58.083	25.399	-11.039			-46.697	17.736	-1.1853				-106.47	22.179	-8.3992			-100.34	22.823	-6.2297
	-57.289	25.123	-12.414			-46.3	17.492	0.37143				-105.44	22.645	-8.2999			-100.55	24.288	-5.7417
	-58.306	23.241	-10.695			-47.174	18.61	0.3602				-105.09	23.091	-7.8846			-100.45	24.034	-6.0562
	-57.672	24.011	-11.695			-46.933	19.559	0.97366
											Antidrom ipsi
											OB-10-03-c012-VMN-chloride
OB-10-02-c012-VMN-chloride					OB-10-02-c012-VMN-chloride							RMP_neuron	MAXdepol_neuron	MINhyperpol_neuron
before												-61.764	14.95	-8.7014			-66.029	19.337	-5.1384
	-63.687	32.833	-4.3066			-51.207	32.317	-3.6327				-61.362	14.578	-8.6763			-66.045	28.905	-5.0919
	-63.861	30.322	-3.5219			-51.037	25.524	-4.4138				-61.117	14.212	-8.3405			-66.111	28.453	-5.1471
	-64.406	31.6	-2.7018			-51.315	28.61	-1.9996				-61.543	15.339	-7.4572			-66.861	28.103	-4.9472
	-64.103	30.899	-3.4634			-52.221	31.377	-1.8566				-62.459	15.553	-7.2435			-67.337	28.488	-5.0504
	-64.108	29.775	-2.6953			-51.737	26.743	-2.4318				-63.646	19.06	-7.1551			-67.06	27.387	-5.2974
	-64.75	35.514	-2.541			-51.998	30.758	-1.9875				-66.888	19.311	-7.0866			-66.903	27.657	-5.1184
	-62.836	28.076	-4.3944									-67.249	18.574	-7.0307			-67.154	28.793	-5.2646
	-64.147	32.897	-2.4728									-67.413	19.226	-7.5988			-67.325	27.042	-5.1843
	-62.933	31.042	-3.9922									-68.525	19.056	-7.0667			-67.459	28.336	-4.8064
	-63.221	28.737	-2.2387									-68.44	18.269	-7.3348			-67.9	27.312	-5.0977
	-63.513	34.735	-3.1371
											Antidrom ipsi
											OB-10-03-c013-VMN-chloride
OB-10-02-c013-VMN-chloride					OB-10-02-c013-VMN-chloride							RMP_neuron	MAXdepol_neuron	MINhyperpol_neuron
before	RMP_neuron	MAXdepol_neuron	MINhyperpol_neuron		after injection							-60.411	17.962	-9.8095			-64.253	22.719	-8.104
	-54.86	34.902	-12.37			-35.059	15.467	-3.8201				-59.117	17.644	-9.2726			-64.801	23.175	-8.8682
	-52.498	32.753	-13.908			-36.561	17.06	-4.2412				-57.378	16.942	-10.188			-64.873	23.583	-8.3384
	-51.328	32.224	-13.186			-36.678	17.787	-3.2088				-56.634	17.785	-9.1316			-64.893	23.206	-8.5938
	-51.491	32.509	-14.061			-36.692	17.374	-3.744				-57.763	17.724	-8.9176			-65.077	23.268	-8.6531
	-50.817	30.645	-12.934			-32.025	13.105	-7.2812				-57.649	16.755	-9.9171			-65.297	23.336	-8.4636
	-50.956	31.241	-12.582			-36.528	16.234	-1.8933				-54.902	15.778	-9.0323			-65.185	22.887	-8.5762
	-50.285	30.693	-12.703			-35.021	15.642	-4.652				-55.522	16.917	-8.9005			-65.201	25.346	-7.0336
	-48.948	29.966	-13.063			-36.898	17.519	-2.3479				-55.591	16.62	-8.7707			-65.059	23.005	-8.5192
	-51.089	31.711	-10.678			-35.214	15.682	-4.7033				-55.914	16.394	-8.8747			-64.518	22.373	-9.3041
	-51.653	32.153	-10.664			-35.751	15.884	-1.9073				-56.785	16.167	-8.5221			-65.042	22.866	-8.2616
	-52.502	32.33	-9.998			-34.742	14.966	-3.8937				-56.31	16.362	-8.723			-64.669	23.379	-9.2446
											Antidrom ipsi
OB-10-02-c018-VMN-chloride					OB-10-02-c018-VMN-chloride						OB-10-03-c014-VMN-chloride
before					after injection							RMP_neuron	MAXdepol_neuron	MINhyperpol_neuron			RMP_neuron	MAXdepol_neuron	MINhyperpol_neuron
	RMP_neuron	MAXdepol_neuron	MINhyperpol_neuron		tracenumber	RMP_neuron	MAXdepol_neuron	MINhyperpol_neuron				-56.361	48.244	-9.0682			-60.583	46.942	-9.3937
	-48.722	30.197	-15.915			-51.271	27.468	1.0089				-56.34	47.337	-9.4561			-60.821	47.21	-8.8813
	-47.045	27.727	-15.333			-50.743	23.551	0.66321				-56.572	46.501	-9.7737			-59.004	46.431	-10.79
	-47.044	26.414	-15.334			-51.763	27.105	0.49362				-58.052	47.341	-8.9643			-60.595	47.686	-9.565
	-46.403	24.37	-14.113			-50.072	21.599	-0.19049				-57.827	46.871	-9.2204			-61.058	48.485	-9.2238
	-48.24	27.305	-11.94			-52.85	25.445	2.0989				-57.899	46.852	-9.3311			-61.62	48.62	-8.9364
	-46.561	25.504	-13.833			-51.464	24.7	-0.050049				-58.015	46.754	-9.0627			-62.161	48.611	-8.8231
	-46.022	25.24	-13.273			-51.108	24.344	0.78412				-56.523	44.987	-10.433			-62.738	48.883	-8.8867
	-46.689	24.625	-12.881			-51.84	26.266	0.90594				-57.737	45.835	-9.4325			-62.285	48.216	-9.1261
	-46.765	25.433	-12.103			-52.082	24.25	1.8195				-57.839	46.395	-9.2995			-63.291	48.551	-8.6388
	-47.254	27.937	-11.614			-53.633	28.425	1.8141				-57.196	46.454	-9.0882			-62.572	47.832	-9.2661
	-47.25	26.346	-11.557			-51.543	25.023	-0.45892
											OB-11-10-c013-VMN-chloride
OB-10-02-c020-VMN-chloride					OB-10-02-c020-VMN-chloride							-57.341	5.2776	-1.2532			-58.766	5.2386	0.081127
before					after injection							-57.893	5.5247	-1.0366			-59.126	5.5375	0.013851
	RMP_neuron	MAXdepol_neuron	MINhyperpol_neuron			RMP_neuron	MAXdepol_neuron	MINhyperpol_neuron				-57.356	5.0487	-1.36			-59.361	5.5586	0.004414
	-45.843	23.779	-13.819			-38.267	19.896	5.8883				-56.88	5.031	-1.1641			-59.303	5.3786	0.099011
	-46.346	23.763	-13.774			-36.112	16.092	1.261				-56.83	5.2857	-1.4587			-59.696	5.6185	0.15586
	-46.366	25.461	-13.357			-36.503	19.108	5.0696				-56.726	5.3342	-1.2576			-59.31	5.4773	0.014612
	-47.181	24.353	-12.664			-32.251	16.077	1.3365				-56.507	4.9929	-1.1106			-59.354	5.5212	-0.12458
	-48.967	24.736	-11.244			-35.733	20.138	1.7667				-57.482	5.2051	-0.47116			-59.61	5.5634	-0.082344
	-48.415	25.955	-12.528			-33.41	16.564	1.3358				-57.668	5.7878	-0.86507			-60.167	5.7234	0.016591
	-47.961	23.211	-12.983			-33.705	16.157	3.1566				-57.565	5.5627	-1.0596			-60.214	5.6486	0.063851
	-47.604	23.495	-12.21			-29.955	16.527	1.9394				-58.248	5.6358	-0.80343			-60.529	5.5365	0.043379
	-47.98	24.573	-11.529			-32.716	16.084	1.7406
	-49.242	26.751	-10.45			-31.636	17.079	3.9867
	-47.243	23.928	-12.449			-31.045	16.824	0.68015
											OB-11-10-c012-VMN-chloride
OB-10-03-c008-VMN					OB-10-03-c008-VMN							-55.518	13.313	-0.93912			-49.791	8.2562	-1.1737
	RMP	AP_amp	AHP_amp			RMP	AP_amp	AHP_amp				-55.141	13.301	-1.1033			-50.106	8.6324	-1.1332
	-74.103	37.634	-15.436			-62.033	28.861	-6.387				-54.839	13.335	-0.97763			-50.078	8.4214	-1.2527
	-74.913	37.59	-14.656			-88.596	31.376	-3.0483				-54.527	13.206	-0.95396			-49.959	8.5162	-1.3104
	-75.972	38.466	-13.688			-100.38	32.352	-2.0409				-54.547	12.982	-0.78105			-49.973	8.4695	-1.2961
	-74.151	36.89	-13.953			-105.36	32.908	-1.791				-54.514	13.071	-0.17321			-50.022	8.7623	-1.5221
	-74.578	37.865	-13.343			-108.06	31.768	-1.0381				-54.298	13.007	-0.17618			-49.825	8.1071	-0.92611
	-74.013	37.239	-13.45			-108.68	33.3	-1.4595				-54.658	13.063	0.0012177			-49.714	8.6674	-1.8001
	-74.056	37.374	-12.736			-108.88	32.887	-1.5061				-54.374	13.206	-0.13044			-49.829	8.8741	-1.5018
	-73.682	37.641	-13.171			-109.48	32.485	-1.0537				-54.384	4.0608	-0.51682			-49.733	8.6869	-1.445
	-73.859	37.604	-12.872			-109.48	32.397	-1.2336				-54.483	3.4269	-0.38782			-49.548	8.746	-1.2638
	-72.83	36.972	-12.497			-109.05	32.577	-1.4196				-54.178	2.8476	-0.38729			-49.524	8.6003	-1.4705
												-53.983	13.608	-0.24718			-49.533	8.4562	-0.76012
OB-10-03-c009-VMN-chloride:					OB-10-03-c009-VMN-chloride:
	-51.944	40.683	-3.262			-25.273	27.348	-1.6741			OB-10-02-c009-VMN-chloride:
	-51.508	40.064	-3.2104			-25.846	27.097	-1.5896				-57.085	15.031	-13.991			-46.885	9.867	-1.4245
	-50.428	39.839	-3.893			-26.6	26.844	-1.7506				-58.123	17.321	-13.075			-48.092	9.792	-1.2858
	-49.606	38.589	-3.525			-26.485	27.279	-1.4384				-57.84	15.482	-12.534			-47.396	9.3409	-1.7675
	-50.148	39.528	-3.5015			-25.884	27.532	-1.5514				-58.101	15.987	-12.578			-48.27	9.9702	-1.3213
	-49.735	40.427	-3.6404			-26.297	27.183	-1.4735				-57.799	17.271	-12.178			-48.404	9.1888	-1.8891
	-49.258	39.004	-3.2631			-26.172	27.026	-1.3246				-57.502	15.266	-11.407			-48.665	9.6025	-1.3228
	-48.361	38.839	-3.2749			-25.237	26.733	-1.557				-57.223	15.444	-11.564			-50.421	9.5276	-1.4282
	-48.085	39.022	-3.4893			-24.742	26.634	-1.8389				-58.108	14.773	-10.648			-49.593	9.4317	-1.4936
	-48.159	38.485	-2.9884			-24.031	27.449	-1.421				-57.205	14.053	-10.727			-51.4	9.7741	-1.792
						-23.197	27.164	-1.4002				-58.334	15.915	-10.147			-49.765	9.634	-2.0543
												-57.623	13.433	-10.126			-49.799	10.218	-1.348
OB-10-03-c014-VMN-chloride					OB-10-03-c014-VMN-chloride
	-56.818	50.41	-6.2311			-66.476	49.112	-4.2635			OB-10-02-c012-VMN-chloride
	-56.74	50.056	-6.279			-67.406	50.163	-2.8154				-63.69	30.608	-2.32			-52.67	26.456	-1.1626
	-56.506	49.731	-6.7872			-67.471	50.259	-3.4523				-63.625	27.797	-2.0184			-52.702	28.227	-1.6499
	-57.708	50.048	-6.1046			-67.006	50.068	-3.1542				-63.594	28.407	-1.4999			-53.273	25.837	-1.7811
	-58.515	50.336	-5.938			-66.701	50.252	-5.6256				-64.05	27.826	-1.7149			-51.916	26.8	-1.5511
	-58.451	49.846	-5.5439			-65.7	49.953	-3.4227				-63.794	26.38	-1.9099			-53.175	26.808	-1.2378
	-58.282	48.241	-5.3476			-66.073	50.906	-3.385				-63.987	32.187	-1.9312			-51.556	27.935	-1.3314
	-59.674	50.213	-3.9556			-65.709	49.84	-3.2607				-64.097	26.957	-1.7905			-51.778	29.866	-1.3226
	-57.014	46.486	-6.8897			-65.717	48.047	-5.1144				-62.913	29.405	-1.9065			-52.43	27.039	-1.5254
	-57.905	48.475	-6.5479			-64.68	49.573	-5.7551				-63.755	28.782	-1.7052			-51.271	29.665	-1.4021
						-64.196	48.174	-3.8886				-62.567	25.58	-1.7641			-51.781	28.526	-1.7473
												-63.162	33.407	-2.0239
OB-11-10-c012-VMN-chloride					OB-11-10-c012-VMN-chloride
	-47.837	28.275	-11.276			-52.022	30.385	-2.5738			OB-10-02-c018-VMN-chloride
	-48.2	28.73	-11.034			-51.963	31.303	-2.6632				-52.491	26.155	-3.6001			-61.777	15.421	-1.6081
	-48.073	28.358	-10.918			-52.13	31.5	-2.4967				-49.876	21.922	-3.9572			-58.897	14.341	-1.4976
	-49.518	30.109	-9.7169			-52.239	31.395	-2.388				-48.91	18.545	-3.8241			-61.816	16.223	-1.4776
	-51.727	31.616	-8.8196			-52.249	31.771	-2.1338				-48.361	18.057	-4.3734			-61.797	16.112	-1.4663
	-52.911	35.333	-7.9718			-52.105	32.879	-2.3691				-48.167	16.978	-3.7738			-60.757	14.798	-1.2242
	-53.055	35.019	-7.6444			-52.182	32.041	-2.3219				-49.387	18.625	-3.0425			-61.642	15.53	-1.6514
	-54.311	36.794	-6.999			-52.228	31.293	-2.3684				-47.021	16.168	-3.2109			-63.062	17.103	-1.7267
	-54.545	37.15	-6.7649			-52.273	11.288	-1.102				-47.989	17.044	-3.2808			-61.725	16.711	-1.5992
	-55.371	39.502	-5.6949			-52.03	32.316	-2.3518				-46.056	15.417	-1.3986			-60.868	16.098	-1.3883
OB-11-10-c013-VMN-chloride					OB-11-10-c013-VMN-chloride
	-57.878	30.442	-8.4982			-61.743	5.5601	-1.0317
	-57.991	30.708	-8.2322			-61.974	30.205	-1.2582
	-57.291	28.818	-8.0468			-61.991	5.106	-1.1806
	-57.459	29.78	-8.1538			-62.312	30.3	-1.1641
	-57.072	30.247	-7.7167			-62.497	6.162	-1.0097
	-56.428	28.596	-7.9944			-62.583	31.76	-1.107
	-57.118	30.109	-7.4577			-62.373	5.5191	-0.88956
	-57.525	29.968	-7.7521			-62.283	30.544	-1.2549
	-58.007	30.205	-6.7822			-62.123	6.4899	-1.1395
	-58.226	30.668	-6.1357			-62.154	29.439	-1.6278
