# Supplementary material for: Gap junction-mediated glycinergic inhibition ensures precise temporal patterning in vocal behavior
Source: eLife. 2021 Mar 15;10:e59390. doi: 10.7554/eLife.59390 (PMC7963477; doi:10.7554/eLife.59390)
Supplement: Figure 7—source data 1. [file elife-59390-fig7-data1.xlsx]

## Sheet: Strychnine
		Control								Strychnine apllication
	Vocal				antidrom
	lowest amplitude neuron VOC	highest amplitude neuron VOC	baseline neuron							Vocal				antidrom
	HYP	AP	RMP		HYP	AP	RMP			HYP	AP	RMP		HYP	AP	RMP
OB-15-14-c018	-0.52337	23.555	-55.019		-2.8688	16.51	-55.237		OB-15-14-c042	1.5649	27.78	-60.708		-0.56728	10.602	-55.555
	-0.5653	25.741	-54.763		-2.9074	17.173	-54.679			1.4008	29.08	-62.344		1.06	15.861	-56.877
	-0.73425	26.243	-54.686		-3.0017	15.706	-54.249			1.497	26.369	-59.663		-0.025343	14.44	-55.913
	-0.66545	25.336	-54.846		-2.1765	16.348	-54.83			0.93326	25.408	-58.459		0.056317	12.691	-55.049
	-0.42534	22.951	-54.995		-2.2323	16.109	-55.019			0.88912	26.249	-58.75		-0.42458	6.7776	-54.171
	-1	26.1	-54.542		-1.5113	16.158	-54.763			-0.032572	23.161	-56.181		-1.8604	12.544	-54.261
	-0.74734	23.728	-54.642		-1.7718	15.898	-54.686			1.0219	22.628	-56.778		-0.71111	10.153	-54.037
	-0.61598	25.232	-54.804		-1.8862	15.814	-54.846			0.28562	21.739	-55.522		-0.48668	9.6146	-52.766
	-0.39178	24.114	-54.815		-1.0662	16.268	-54.995			0.56187	22.107	-55.555		-0.25099	6.4629	-52.697
	-0.35145	22.537	-54.702		-0.93897	15.876	-54.542			0.66324	24.375	-56.877		-1.3685	6.1083	-52.922
	-0.56636	22.261	-54.64		-1.6018	15.641	-54.642							-0.22154	6.5839	-53.184
	-0.40244	23.767	-54.773
	-0.25617	22.754	-54.92
									OB-15-14-c041	0.40723	18.26	-52.348		-0.81355	7.3652	-50.761
										0.6554	18.844	-52.535		-1.1629	7.6872	-51.144
										0.59018	20.182	-53.08		-0.17991	8.7007	-52.493
OB-15-14-c019	2.336	39.445	-73.106		-2.8215	28.367	-73.106			-0.38699	16.581	-50.608		0.20647	11.528	-52.514
	2.4381	39.486	-73.208		-2.2922	28.561	-73.208			0.29163	18.053	-51.744		-0.30738	11.045	-51.42
	2.3148	39.302	-73.268		-1.8356	28.285	-73.268			0.56157	19.269	-52.838		-0.13097	10.245	-51.84
	1.652	39.402	-73.582		-1.4608	28.019	-73.582			0.77968	20.402	-53.087		-0.47405	7.0028	-52.321
	2.0228	39.163	-73.526		-1.2731	28.421	-73.526			0.071461	17.619	-50.761		-0.31203	5.6694	-52.85
	1.8729	39.226	-73.254		-1.1178	28.24	-73.254			-0.43044	18.46	-51.144		-1.0989	7.8123	-51.819
	2.4069	40.218	-73.574		-2.3538	28.377	-73.574			0.55251	19.565	-52.493		-0.60845	8.5468	-52.492
	1.8382	39.405	-73.829		-2.3732	28.114	-73.829							-0.7997	9.088	-53.308
	2.593	39.702	-73.76		-2.2593	28.411	-73.76
	1.2158	12.751	-73.542		-4.3079	27.766	-73.542
									OB-15-14-c039	0.78235	39.204	-48.848		0.42336	39.242	-48.458
OB-15-14-c020	1.6427	27.186	-58.344		-0.73767	16.291	-58.344			1.3132	36.225	-48.219		0.78455	39.389	-48.758
	2.0982	24.437	-55.199		0.80738	12.221	-46.248			1.2497	37.505	-48.491		2.0641	37.8	-48.848
	2.4248	21.865	-46.248		-2.9867	8.1217	-40.409			0.9376	36.185	-48.179		2.0151	36.622	-48.219
	0.0040335	17.399	-40.409		-1.469	9.2427	-40.676			0.8465	35.728	-47.996		1.5549	37.108	-48.491
	0.91142	18.032	-40.676		-3.9134	6.7372	-39.971			0.93242	34.288	-48.631		1.3038	35.453	-48.179
	-0.098706	17.754	-39.971		-0.82032	8.7622	-39.463			0.73684	37.205	-47.551		0.69391	33.348	-47.996
	0.91918	18.284	-39.463		-1.6476	7.0499	-33.081			0.73265	38.025	-47.913		1.4207	34.41	-48.631
	1.4883	16.839	-38.415		-0.96028	7.6762	-33.738			0.57991	39.307	-49.103		0.52321	38.182	-47.551
	0.79376	14.099	-33.081		0.16948	4.8082	-30.443			0.91423	34.361	-48.4		0.51903	38.513	-47.913
	0.3825	14.482	-33.738		-0.50152	6.5786	-28.063			0.743	38.676	-48.93		0.7325	37.75	-49.103
					-0.31043	5.8846	-26.881
									OB-15-14-c037	2.7678	46.255	-64.596		2.4626	43.997	-64.596
OB-15-14-c023	-2.3524	25.907	-57.218		-1.3758	15.287	-57.218			2.2278	45.563	-64.331		2.1362	42.969	-64.331
	-2.3538	8.8156	-57.278		-0.64483	15.926	-57.278			1.8234	43.907	-63.774		2.3116	43.236	-63.774
	-2.395	24.522	-54.551		-1.9372	13.016	-54.551			2.5718	44.015	-64.37		2.877	43.679	-64.37
	-3.0101	25.188	-54.21		-1.9725	12.31	-54.21			2.0147	44.465	-63.66		2.3504	43	-63.66
	-2.5999	12.781	-54.682		-1.0741	12.293	-54.682			1.9648	44.903	-63.519		2.2089	42.797	-63.519
	-0.51971	28.869	-55.053		-2.1677	13.03	-55.053			2.7626	43.504	-63.798		3.0677	43.046	-63.798
	-1.1932	20.474	-50.931		-2.9022	11.716	-50.931			2.2486	43.356	-63.284		2.5843	42.929	-63.284
	-0.40305	22.119	-48.822		-5.8657	16.137	-48.822			1.7746	43.584	-62.718		1.9577	41.936	-62.718
	-0.82854	20.747	-48.152		-6.1996	14.308	-48.152			1.9394	43.748	-62.761		1.9394	39.537	-62.761
	-0.29833	22.803	-50.971		-4.1741	16.486	-50.971			2.1083	42.941	-62.381
	-2.5123	21.291	-52.297		-2.4818	17.477	-52.297
									OB-15-14-c036	-0.50898	27.903	-51.92		-0.35639	26.469	-51.92
										0.75921	29.934	-55.538		0.94232	30.727	-55.538
OB-15-14-c024	-4.4509	17.857	-48.772		-3.0699	10.999	-47.589			2.6777	32.86	-54.619		4.6919	29.686	-54.619
	-4.044	17.105	-46.585		-2.1694	7.6267	-47.391			-1.5506	26.22	-51.519		-1.3675	26.953	-51.519
	-3.7759	17.373	-46.822		-3.7485	12.304	-47.094			1.1875	30.637	-53.128		1.0349	27.555	-53.128
	-3.6937	17.974	-47.149		-3.1582	9.1098	-47.44			0.89635	31.292	-54.76		1.5983	29.613	-54.76
	-3.5471	17.846	-47.844		-2.4425	13.213	-47.942			1.2514	31.25	-55.084		1.4955	29.877	-55.084
	-2.8904	17.16	-46.518		0.72101	10.487	-50.312			1.3735	31.922	-55.756		2.5942	30.426	-55.756
	-3.2064	17.729	-46.812		-1.0547	13.777	-48.842			1.071	31.192	-54.568		1.7119	28.171	-54.568
	-3.1505	18.914	-47.57		-1.2483	9.3413	-48.587			1.3775	30.796	-54.905		2.0794	29.179	-54.905
	-2.8258	18.506	-47.589		-0.94924	9.5488	-48.794			0.53394	30.197	-55.252
	-0.46043	17.362	-47.391		-0.70716	8.8754	-49.189
					-0.64239	9.0012	-48.521
									OB-17-09-c012-STRYchnin	AHP_amp	AP_amp	RMP		AHP_amp	AP_amp	RMP
										0.3	11.44	-27.46		-0.025	8.123	-30.065
										-0.19	12.41	-29.44		0.546	8.695	-30.942
										-0.06	9.86	-24.84		0.23	8.47	-29.802
										-0.5	9.329	-24.1		-0.114	7.424	-27.871
OB-17-09-c001										0.6	11.2	-26.9		-0.101	7.619	-28.463
	AHP_amp	AP_amp	RMP		AHP_amp	AP_amp	RMP			0.6	11.7	-28		0.11	7.739	-27.942
	-9.988	4.386	-36.216		-2.662	1.732	-35.973							-0.064	7.84	-28.287
	-8.922	4.567	-36.427		-3.114	1.891	-35.43							0.044	7.063	-26.838
	-9.86	3.109	-35.275		-2.631	1.428	-35.913							0.115	7.805	-28.374
	-8.122	4.116	-36.251		-2.194	1.743	-36.35							-0.168	7.859	-28.519
	-7.806	4.096	-36.17		-2.383	1.859	-36.435							0.153	8.545	-29.358
	-7.317	3.699	-35.987		-2.121	1.602	-35.904							0.139	8.684	-29.985
	-6.796	3.885	-36.02		-2.447	1.582	-35.853							0.207	9.24	-30.236
	-6.479	3.591	-35.757		-2.196	1.558	-35.829
	-6.032	3.367	-35.594		-1.914	1.595	-35.897
	-5.897	3.258	-35.698		-1.497	1.524	-36.192									RMP
	-5.262	3.435	-35.906		-1.935	1.392	-35.785		OB-17-09-c013-STRYchnin	-2.4	17.285	-34.1		0.688	12.071	-36.241
	-5.194	3.534	-35.12		-1.433	1.436	-35.188			-2.5	11.84	-29.9		0.135	12.342	-36.329
	-5.048	3.863	-34.808		-1.529	1.37	-34.39			-2	13.5	-30.8		0.261	12.59	-36.211
	-4.733	3.72	-34.482		-1.461	1.53	-33.36			-0.8	15.6	-32.9		-0.479	11.698	-35.471
	-2.79	4.717	-34.777		-1.516	1.414	-34.129			-0.04	14.9	-33.2		-0.005	12.019	-35.67
										0.6	14.3	-33		0.071	12.003	-35.471
OB-17-09-c005										0	14.6	-32.9		-0.268	12.305	-35.529
			RMP											-0.016	12.649	-35.781
	-11.375	55.4585	-58.907		-4.235	33.302	-52.345							0.135	12.555	-36.054
	-11.512	54.9552	-58.892		-0.614	33.535	-53.86							0.134	12.707	-35.931
	-10.644	54.7556	-58.906		-8.221	26.661	-47.26							-0.081	13.042	-36.113
	-10.96	53.5848	-58.254		-8.391	24.354	-46.144							-0.13	12.931	-36.094
	-11.523	52.1972	-57.019		-8.404	23.456	-45.856							0.348	13.104	-36.267
	-12.304	48.7614	-55.048		-7.651	24.637	-46.579							0.053	13.267	-36.369
	-12.542	43.8545	-52.552		-8.038	23.273	-45.887							-0.232	13.593	-36.725
	-13.778	38.987	-49.607		-7.916	22.876	-45.52							-0.324	13.409	-36.663
	-13.846	34.83	-47.403		-9.301	20.026	-43.83
	-14.094	32.75	-46.666		-8.207	19.808	-42.879
	-13.7	31.314	-45.962		-5.792	15.815	-41.602					RMP				RMP
	-13.199	31.875	-46.371						OB-17-09-c014-STRYchnin	-0.098	14.947	-43.054		0.011	12.676	-42.034
	-12.893	30.747	-45.853							-9.927	15.219	-41.983		0.075	13.411	-42.403
	-12.631	30.552	-45.658							0.981	25.273	-56.584		-0.099	14.122	-43.083
										2.318	31.187	-57.829		0.035	14.623	-43.462
OB-17-09-c006										1.652	31.712	-56.34		-0.6	14.262	-43.528
			RMP				RMP			1.662	23.452	-57.357		-0.598	15.027	-44.568
	-5.184	27.073	-53.288		0.203	4.292	-61.879			2.426	29.831	-58.853		-0.354	14.722	-44.11
	-5.562	27.245	-53.093		0.202	3.956	-62.946							-0.552	14.554	-43.576
	-5.657	27.759	-53.272		0.135	8.07	-63.551							-0.551	14.555	-43.333
	-5.351	28.096	-53.029		-3.048	10.441	-63.877							-0.125	14.707	-43.271
	-5.282	28.41	-52.885		-4.482	32.048	-63.267							-0.554	14.857	-43.971
	-5.282	29.386	-53.312		-4.671	30.332	-62.864							-0.755	14.412	-42.824
	-5.621	29.078	-53.278		-4.367	14.31	-62.68							-0.423	16.117	-44.987
	-5.702	30.156	-53.563		-4.354	30.528	-62.388							-0.797	16.904	-45.407
	-5.5	32.708	-55.596		-4.696	33.023	-61.771							-0.33	17.584	-45.996
	-5.69	35.539	-59.373		-4.207	12.608	-61.497							-0.568	18.139	-46.032
	-5.8	36.68	-60.087		-4.864	13.355	-61.39							-0.541	18.014	-45.968
	-6.016	37.624	-60.512		-5.027	12.49	-60.921							-0.029	19.166	-47.212
	-5.664	37.793	-61.383		-5.215	27.378	-60.215
	-5.846	39.748	-62.117		-4.688	12.585	-60.253
												RMP				RMP
									OB-17-09-c015-STRYchnin	0	28.1	-43.5		-0.282	38.72	-54.894
OB-17-09-c007										0	29.2	-45.6		0.261	33.525	-51.927
			RMP				RMP			0	29.3	-45.1		0.072	27.966	-48.748
	-14.569	10.273	-39.417		-8.321	4.405	-39.134			0	28.2	-44.1		-0.107	25.986	-47.226
	-13.595	9.568	-38.773		-7.653	3.913	-38.795			1.201	39.897	-59.764		0.011	25.737	-47.069
	-12.536	8.796	-38.215		-7.049	3.755	-38.148			1.814	39.442	-60.255		-0.349	25.926	-47.319
	-11.484	8.077	-37.893		-6.11	3.717	-37.744			1.314	37.661	-60.213		0.227	26.472	-44.386
	-10.777	7.777	-37.471		-6.911	3.404	-37.217			2.248	38.351	-60.415		-0.485	25.669	-45.444
	-10.073	7.292	-36.833		-6.178	3.374	-36.76			2.805	37.626	-60.331		-0.271	23.777	-45.2
	-9.308	6.714	-36.499		-6.095	3.274	-36.233			2.538	38.183	-60.491		-0.301	23.32	-43.736
	-8.561	6.789	-36.025		-5.398	2.933	-35.831			2.74	37.957	-60.357		-0.228	22.812	-43.015
	-8.096	6.278	-35.636		-4.697	2.78	-35.373			1.431	16.781	-60.421		-0.021	23.478	-43.436
	-7.693	6.437	-35.093		-4.342	2.708	-35.026			1.48	39.932	-59.982		-0.251	23.553	-42.352
	-6.883	5.934	-35.048		-4.567	2.635	-34.923			1.682	38.333	-60.428		-0.238	23.26	-42.822
	-6.683	5.982	-34.821		-4.053	2.57	-34.674			1.546	33.925	-60.445		0.328	23.674	-43.663
					-3.734	2.614	-34.505			2.043	37.993	-60.393		-0.209	23.106	-42.729
										1.572	39.078	-60.227		-0.159	22.759	-42.138
OB-17-09-c009										2.334	38.253	-60.348
			RMP				RMP			2.291	33.022	-60.274
	-10.586	23.136	-55.881		-9.863	22.608	-55.109
	-10.763	23.264	-56.101		-9.586	21.787	-55.6
	-10.475	23.186	-56.023		-9.554	22.673	-56.181
	-9.894	26.544	-56.573		-8.307	23.156	-56.756									RMP
	-10.228	24.867	-56.056		-8.691	22.833	-56.311							-0.488	14.038	-34.607
	-10.847	24.92	-55.071		-8.657	22.501	-55.735		OB-17-09-c016-STRYchnin	1.773	30.154	-51.547		-0.694	15.205	-36.049
	-9.867	25.502	-56.081		-7.814	23.222	-56.181			2.567	29.148	-51.487		0.071	15.604	-36.417
	-9.707	25.358	-56.272		-8.691	22.773	-55.671			2.078	19.046	-46.664		-0.595	14.542	-34.317
	-9.739	25.265	-55.996		-8.767	21.659	-54.893			1.913	27.67	-48.361		-0.06	14.802	-34.974
	-9.464	25.6	-55.996		-8.049	22.713	-56.16			0.922	27.594	-49.506		-0.014	15.184	-35.356
	-8.945	25.571	-56.79		-7.81	23.287	-56.521			1.651	28.293	-51.151		-0.424	14.591	-34.885
	-8.972	26.794	-56.915		-7.355	23.834	-57.098			1.682	27.653	-51.731		-0.433	14.582	-34.174
	-9.159	25.784	-56.149							2.281	27.611	-52.147		-0.42	14.625	-34.492
	-8.91	26.551	-56.306							2.023	30.923	-53.72		-0.496	14.488	-34.813
										1.784	31.447	-53.389
