# Supplementary material for: Gap junction-mediated glycinergic inhibition ensures precise temporal patterning in vocal behavior
Source: eLife. 2021 Mar 15;10:e59390. doi: 10.7554/eLife.59390 (PMC7963477; doi:10.7554/eLife.59390)
Supplement: Supplementary file 1. [file elife-59390-supp1.xlsx]

## Sheet: Sheet1
Figure	Description	Means and SE	p-value	Cohen's d	Animals (Neurons)
Related to Figure 2
fig2a	amplitude of 1st vs 2nd VN potential	36.6 ± 4.1 vs 73.89 ± 4.4 µV	< 0.0001	4.53375	4 (4,4,3,3)
fig2a	halfwidth of the 1st vs 2nd motorneuron AP	0.81 ± 0.11 vs 0.62 ± 0.06 ms	0.00118	1.58236	3 (4,2,2)
fig2c	midbrain vs antidromic evoked HYP amplitude	-10.92 ± 1.16 vs -2.95 ± 0.7 mV	0.000109	3.5174	5 (1,3,2,3,3)
fig2c	midbrain vs antidromic evoked AP amplitude	29.13 ± 1.48 vs 21.46 ± 2.93 mV	0.023614	1.5888	5 (1,3,2,3,3)
Related to Figure 3
fig3b	shorter peak latency of ipsi AP vs subthreshold depol.	1.42 ± 0.31 vs 3.54 ± 0.28 ms	0.00252	12.1344	4 (1,4,2,2)
fig3b	ipsi vs contra peak latency of AD AP	1.42 ± 0.31 vs 3.47 ± 0.16 ms	0.00414	9.94559	4 (1,5,2,3)
fig3b	ipsi vs contra peak latency of AD HYP	8.38 ± 0.67 vs 8.3 ± 0.78 ms	0.80626	0.296228	4 (1,4,2,3)
fig3b	contra peak latency of AD vs subthreshold depol.	3.47 ± 0.16 vs 3.54 ± 0.28 ms	0.87717	0.797083	4 (1,4,2,2)
Related to Figure 5
fig5a	QX314 effect on midbrain evoked AP (control vs drug)	31 ± 2.67 vs 27.27± 2.53 mV	0.015	2.48959	2 (5,2)
fig5a	QX314 effect on midbrain evoked HYP	-9.87 ± 0.75 vs -2.19 ± 0.95 mV	0.002997	3.96856	2 (5,2)
fig5b	QX314 effect on antidromic evoked AP	21.92 ± 7.16 vs 8.9 ± 6.82 mV	0.0062	3.43411	2 (5,2)
fig5b	QX314 effect on antidromic evoked HYP	-4.44 ± 3.57 vs -4.3 ± 3.56 mV	0.7029	0.175169	2 (5,2)
fig5c	CBX effect on midbrain evoked AP (control vs drug)	22.9 ± 2.04 vs 20.55 ± 2.13 mV	0.435115	0.324999	3 (10,10,5)
fig5c	CBX effect on midbrain evoked HYP	-8.1 ± 1.37 vs -1.7 ± 1.41 mV	0.000276	1.92068	3 (10,10,5)
fig5d	CBX effect on antidromic evoked AP	17.8 ± 2.05 vs 16.15 ± 2.14 mV	0.59	0.220681	3 (10,10,5)
fig5d	CBX effect on antidromic evoked HYP	-4.79 ± 0.94 vs -0.79 ± 0.97 mV	< 0.0001	2.16151	3 (10,10,5)
Related to Figure 7
fig7b	Strychnine effect on midbrain evoked AP (before vs after)	23.22 ± 2.21 vs 27.92 ± 2.22 mV	0.15	0.708309	2 (10,10)
fig7b	Strychnine effect on antidromic evoked AP	13 ± 2.54 vs 21.15 ± 2.53 mV	0.03551	1.06866	2 (10,10)
fig7b	Strychnine effect on midbrain evoked HYP	-4.67 ± 1.88 vs 0.89 ± 1.88 mV	0.00059	2.06964	2 (10,10)
fig7b	Strychnine effect on antidromic evoked HYP	-3.85 ± 0.86 vs 0.4 ± 0.86 mV	0.000174	2.68327	2 (10,10)
fig7b	Strychnine effect on midbrain evoked AP interval	9.61 ± 0.69 vs 7.94 ± 0.69 ms	0.04853	1.02387	2 (10,10)
fig7b	Strychnine effect on AP interval variability (CV, %)	4.9 ± 3.95 vs. 13.54 ± 3.95 %	0.00895	1.4311	2 (10,10)
Related to Supplementary Figure 2
figS2c	Dorsal nerve cut, midbrain evoked HYP (before vs after)	-8.21 ± 3.1 vs -7.51 ± 1.22 mV	0.8	0.638944	2 (10,8)
figS2c	Dorsal nerve cut, antidromic evoked HYP (before vs after)	-3.2 ± 0.59 vs -4.84 ± 0.71 mV	0.117	0.317575	2 (10,8)
Related to Supplementary Figure 4
figS4b	Chloride effect on midbrain evoked HYP (before vs after)	-9.62 ± 1.34 vs. -1.2 ± 1.23 mV	0.000839	3.26953	3 (5,3,2)
figS4c	Chloride effect on antidromic evoked HYP	-5.28 ± 1.95 vs. -3.3 ± 1.71 mV	0.093081	1.34872	3 (4,3,2)
